# Supplementary material for: Identification of a pKa-regulating motif stabilizing imidazole-modified double-stranded DNA
Source: PubMed Central journal article supplement (PMC4288195; doi:10.1093/nar/gku1306), 2014-12-17
Supplement: supp_gku1306_nar-01928-f-2014-File002.pdf [file supp_gku1306_nar-01928-f-2014-File002.pdf]

## SUPPORTING INFORMATION – IDENTIFICATION OF A PKA-REGULATING MOTIF STABILIZING IMIDAZOLE MODIFIED DOUBLE STRANDED DNA

Dieter Buyst<sup>1</sup>, Vicky Gheerardijn<sup>2</sup>, Krisztina Fehér<sup>1</sup>, Bjorn Van Gasse<sup>1</sup>, Jos Van Den Begin<sup>2</sup>, José C. Martins<sup>1,\*</sup> and Annemieke Madder<sup>2,\*</sup>

<sup>1</sup> Department of Organic and Macromolecular Chemistry, NMR and Structure Analysis Unit, Ghent University, Ghent, Oost-Vlaanderen, 9000, Belgium

<sup>2</sup> Department of Organic and Macromolecular Chemistry, Organic and Biomimetic Chemistry Research Group, Ghent University, Ghent, Oost-Vlaanderen, 9000, Belgium

\*Corresponding Authors: [Annemieke.Madder@UGent.be](mailto:Annemieke.Madder@UGent.be) & [Jose.Martins@UGent.be](mailto:Jose.Martins@UGent.be)

### Table of Contents

|                                                                                                                             |     |
|-----------------------------------------------------------------------------------------------------------------------------|-----|
| Synthesis of the T <sup>lm</sup> modified building block .....                                                              | S1  |
| Synthesis of T <sub>x</sub> <sup>lm</sup> modified oligonucleotides .....                                                   | S6  |
| Concentration determination .....                                                                                           | S6  |
| General assignment of all (non-) exchangeable <sup>1</sup> H resonances .....                                               | S6  |
| Chemical shift perturbation overview of all T <sub>x</sub> <sup>lm</sup> modified duplexes .....                            | S7  |
| T <sub>6</sub> <sup>lm</sup> modified duplex .....                                                                          | S8  |
| T <sub>7</sub> <sup>lm</sup> modified duplex .....                                                                          | S9  |
| T <sub>21</sub> <sup>lm</sup> modified duplex .....                                                                         | S10 |
| T <sub>8</sub> <sup>lm</sup> modified duplex .....                                                                          | S11 |
| T <sub>8</sub> <sup>lm</sup> A <sub>21</sub> modified duplex .....                                                          | S12 |
| sT <sub>21</sub> <sup>lm</sup> modified duplex .....                                                                        | S13 |
| A <sub>8</sub> T <sub>21</sub> <sup>lm</sup> modified duplex .....                                                          | S14 |
| pKaH regulating motif in T <sub>8</sub> <sup>lm</sup> A <sub>21</sub> and sT <sub>21</sub> <sup>lm</sup> .....              | S15 |
| Validation molecular dynamics trajectory: wild type and T <sub>8</sub> <sup>lm</sup> .....                                  | S16 |
| Conformational α/γ space sampling wild type.....                                                                            | S16 |
| Conformational α/γ space sampling T <sub>8</sub> <sup>lm</sup> .....                                                        | S20 |
| B <sub>I</sub> /B <sub>II</sub> space sampling wild type .....                                                              | S24 |
| B <sub>I</sub> /B <sub>II</sub> space sampling T <sub>8</sub> <sup>lm</sup> .....                                           | S29 |
| Zp/Zp(h) space sampling wild type .....                                                                                     | S33 |
| Zp/Zp(h) space sampling T <sub>8</sub> <sup>lm</sup> .....                                                                  | S36 |
| Hydrogen bond persistence T <sub>21</sub> <sup>lm</sup> duplex .....                                                        | S39 |
| Comparison hydrogen bond persistence T <sub>8</sub> <sup>lm</sup> A <sub>21</sub> versus T <sub>8</sub> <sup>lm</sup> ..... | S40 |
| Overview specific Hε1 nOe-contacts .....                                                                                    | S41 |
| Overview specific Hε1 nOe-contacts to exchangeable protons .....                                                            | S42 |
| 31P spectrum of the T <sub>8</sub> <sup>lm</sup> and wild type systems .....                                                | S43 |
| Extended melting temperatures table including thermodynamic data .....                                                      | S44 |

### Synthesis of the $T^m$ modified building block

All chemicals and solvents (Sigma-Aldrich, Fluka, Acros) were purchased and used without any further purification, except dichloromethane, which was distilled from  $\text{CaH}_2$  prior to use. All reactions were performed under argon or nitrogen with magnetic stirring and were monitored by thin layer chromatography (TLC) using SIL G-25 UV254 pre-coated silica gel plates (0.25 mm thickness). Reactions under CO atmosphere were carried out in a Parr-High-Pressure reaction vessel with particular care. TLC plates were visualized by using anisaldehyde (5% anisaldehyde in ethanol with 1% sulfuric acid) or PMA (5% phosphomolybdic acid in ethanol) solutions. Flash column chromatography was performed by using BIOSOLVE silica gel (0.063–0.200 mm particle size, 20–30 g silica/ 1 g compound/ KieselgelMerck, 230-400 mesh, Type 9385, 60 Angström).  $^1\text{H}$  NMR spectra were recorded at 300 MHz,  $^{13}\text{C}$  NMR spectra were recorded at 75 MHz. Chemical shifts ( $\delta$ ) are reported in units of parts per million (ppm), with the residual  $^1\text{H}$  or  $^{13}\text{C}$  peaks of the solvent used as internal standards ( $(\text{CD}_3)_2\text{SO}$ :  $\delta\text{H} = 2.50$  ppm and  $\delta\text{C} = 39.52$  ppm;  $\text{CDCl}_3$ :  $\delta\text{H} = 7.26$  ppm and  $\delta\text{C} = 77.16$  ppm). The following abbreviations are used to explain the observed multiplicities: s, singlet; d, doublet; t, triplet; q, quadruplet; m, multiplet; br, broad; band, several overlapping signals; AB, AB system with strongly skewed signals; app, indicates an “apparent” multiplicity, for which only the observed average coupling constant can be quoted, in absence of information on the real J-values. Where given, assignments of resonances were confirmed by standard COSY and HSQC 2D NMR experiments. High resolution mass spectra (HRMS) were recorded with an Agilent Accurate-Mass Quadrupole Time-of-Flight mass spectrometer.

5-(2-(1-(tert-Butoxycarbonyl)imidazole-4-yl)ethylaminocarbonyl)-2'-deoxyuridine, **1**. 5-Iodo-2'-deoxyuridine (1 g, 2.8 mmol) was dissolved in anhydrous DMF (20 ml) and histamine (3 eq., 944 mg, 8.5 mmol),  $\text{Et}_3\text{N}$  (6 eq., 2.4 ml, 17 mmol) and  $\text{Pd}(\text{PPh}_3)_4$  (0.05 eq., 162 mg, 0.14 mmol) were added in the order listed. The reaction mixture was incubated in a Parr-High-Pressure reaction vessel at 70 °C under 50 psi (4 bar) carbon monoxide for 48 h. The reaction mixture was cooled to room temperature before being filtered over celite and concentrated under vacuum to an oil. The residu was taken up in anhydrous DMF (10 ml) and to the stirring solution under argon,  $\text{Et}_3\text{N}$  (3 eq., 1.2 ml, 8.5 mmol) and tert-butyl dicarbonate (1.5 eq., 930 mg, 4.2 mmol) was added. After 15-30 min stirring at room temperature, the reaction was quenched with anhydrous methanol (5 mL), stirred for 10 min. and again concentrated to an oil under vacuum. The oil was then purified on a silica gel column using a gradient of 5-10 % methanol in dichloromethane as eluent to give a white foam (860 mg, 65 %).  $R_f = 0.23$  ( $\text{CH}_2\text{Cl}_2$ :  $\text{CH}_3\text{OH}$  9:1).  $^1\text{H}$  NMR ( $(\text{CD}_3)_2\text{SO}$ , 300 MHz):  $\delta$  11.84 (s (br), 1H), 8.78 (t,  $J = 6.5$  Hz, 1H), 8.68 (s, 1H), 8.11 (d app,  $J = 1.2$  Hz, 1H), 7.31 (d app,  $J = 1.2$  Hz, 1H), 6.11 (t app,  $J = 6.6$  Hz, 1H), 5.28 (d,  $J = 4.1$  Hz, 1H), 5.00 (t,  $J = 4.14$  Hz, 1H), 4.22 (m, 1H), 3.86 (q,  $J = 3.7$  Hz, 1H), 3.56 (t,  $J = 3.7$  Hz, 2H), 3.52 (q,  $J = 6.5$  Hz, 2H), 2.69 (t,  $J = 6.5$  Hz, 2H), 2.21 (ddd AB,  $J = 3.6, 6.6$  and 13.7 Hz, 1H), 2.12 (dt AB,  $J = 6.6$  and 13.7 Hz, 1H), 1.56 (s, 9H).  $^{13}\text{C}$  APT NMR ( $(\text{CD}_3)_2\text{SO}$ , 75 MHz):  $\delta$  163.1, 161.4, 149.5, 145.8, 140.8, 123.9, 113.6, 105.3, 87.9, 85.5, 85.1, 70.4, 61.2, 45.7, 37.9, 27.8, 27.4; HRMS (ESI):  $m/z$ : calcd for  $\text{C}_{20}\text{H}_{26}\text{O}_8\text{N}_5$ : 464.1781 [M-H]<sup>-</sup>; found: 464.1791.

5-(2-(1-(tert-Butoxycarbonyl)imidazole-4-yl)ethylaminocarbonyl)-5'-O-(4,4'-dimethoxytrityl)-2'-deoxyuridine, **2**. Compound **1** (386 mg, 0.83 mmol) was dried by co-evaporation with dry pyridine (3 x 5 mL), dried overnight under vacuum and dissolved in dry pyridine (5 mL) and dry DCM (2 mL). 4,4'-dimethoxytrityl chloride (1.2 eq., 338 mg, 1 mmol), dissolved in a mixture of dry pyridine (3 mL) and dry DCM (1 mL), was slowly added to the stirring nucleoside solution at 0°C. The reaction was stirred overnight at room temperature and quenched by the addition of anhydrous methanol (3 mL). The solvent was removed under reduced pressure and the residue re-dissolved in DCM (30 mL) and washed with  $\text{NaHCO}_3$  aq, sat. (30 mL) and brine (30 mL). The combined organic phases were dried on  $\text{Na}_2\text{SO}_4$  and reconcentrated under vacuum to an oil. The oil was then purified by chromatography on silica gel using a gradient of 0-5 % methanol in dichloromethane + 1 %  $\text{Et}_3\text{N}$  to give a white foam (420 mg, 66 %).  $R_f = 0.53$  ( $\text{CH}_2\text{Cl}_2$ :  $\text{CH}_3\text{OH}$  9:1).  $^1\text{H}$  NMR ( $\text{CDCl}_3$ , 300 MHz):  $\delta$  9.17 (t,  $J = 6.9$  Hz, 1H), 8.54 (s, 1H), 8.11 (d app,  $J = 1.3$  Hz, 1H), 7.17-7.42 (band, 10H), 6.83 (m, 4H), 6.20 (t app,  $J = 6.5$  Hz, 1H), 4.35 (dt,  $J = 5.0$  and 6.5 Hz, 1H), 3.95 (q app,  $J = 5.0$  Hz, 1H), 3.78 (s, 6H), 3.66 (q,  $J = 6.9$  Hz, 2H), 3.51 (dd AB,  $J = 5.0$  and 10.2 Hz, 1H), 3.36 (dd AB,  $J = 5.0$  and 10.2 Hz, 1H), 2.87 (t,  $J = 6.9$  Hz, 2H), 2.46 (ddd AB,  $J = 5.0, 6.5$  and 13.7 Hz, 1H), 2.23 (dt AB,  $J = 6.5$  and 13.7 Hz, 1H), 1.60 (s, 9H).  $^{13}\text{C}$  APT NMR ( $\text{CDCl}_3$ , 75 MHz):  $\delta$  163.3, 161.8, 158.7, 150.0, 147.0, 145.7, 144.7, 140.8, 135.8, 130.2, 128.2, 128.1, 127.1, 114.0, 113.4, 106.8, 87.0, 85.8, 85.7, 85.4, 72.6, 63.9, 55.4, 46.1, 40.3, 39.5, 28.4, 28.1; HRMS (ESI):  $m/z$ : calcd for  $\text{C}_{41}\text{H}_{44}\text{O}_{10}\text{N}_5$ : 766.3088 [M-H]<sup>-</sup>; found: 766.3081.

5-(2-(1-(tert-Butoxycarbonyl)imidazole-4-yl)ethylaminocarbonyl)-5'-O-(4,4'-dimethoxytrityl)-3'-(2-cyanoethyl-N,N'-diisopropylphosphoramidite)-2'-deoxyuridine, **3**. The DMTr-protected nucleoside **2** (395 mg, 0.51 mmol) was evaporation 3x with dry DCM and further dried in vacuo for 2-3h. The resulting foam was dissolved in dry DCM (15 mL) and cooled in an ice bath. To the stirring nucleoside solution, DIPEA (4 eq., 0.36 mL, 2 mmol) and 2-cyanoethyl-N,N'-diisopropylchlorophosphoramidite (2 eq., 0.23 mL, 1 mmol) was added dropwise. The reaction mixture was stirred for 1 h at room temperature and quenched with 5 %  $\text{NaHCO}_3$  aq.

sol. (2 mL) at 0 °C. The mixture was then diluted with DCM (30 mL) and washed with 5 % NaHCO<sub>3</sub> aq. sol. (40 mL) and brine (3x 40 mL). The combined organic phases were dried on Na<sub>2</sub>SO<sub>4</sub> and re-concentrated under vacuum to yield a white foam. The product was used without further purification (428 mg, quantitative conversion). R<sub>f</sub> = 0.62, 0.66 (CH<sub>2</sub>Cl<sub>2</sub>: CH<sub>3</sub>OH 9:1). <sup>31</sup>P NMR (CDCl<sub>3</sub>, 121 MHz): δ 149.14, 148.74 ppm. HRMS (ESI): m/z: calcd for C<sub>50</sub>H<sub>61</sub>O<sub>11</sub>N<sub>7</sub>P: 966.4166 [M-H]<sup>-</sup>; found: 966.4153.

Reagents for DNA synthesis were obtained from Proligo Reagents (Sigma-Aldrich). Non-modified complementary strands were purchased from Integrated DNA Technologies. All RP-HPLC data of the modified oligonucleotides were recorded on an Agilent 1200 system equipped with a Phenomenex Clarity Column (250 x 4.6 mm, 5 μm) at 50 °C with 0.1 M TEAA buffer (with 8 % ACN) and acetonitrile as mobile phase (linear gradient: 0-30 % ACN in 15 min, 30-100 % ACN in 3 min.). The chromatographs were analyzed at 260nm. Mass spectra analysis of the oligonucleotides was performed on a Agilent G1946C LC/MSD-VL 1100 Series HPLC equipped with API-ESI source. Data were acquired in the negative ionization mode from m/z = 50 to m/z = 1500. The mass spectra were deconvoluted; i.e., the molecular weights of the oligonucleotides were reconstructed from the spectra using the Agilent LC/MSD Chemstation software (version A.08014).

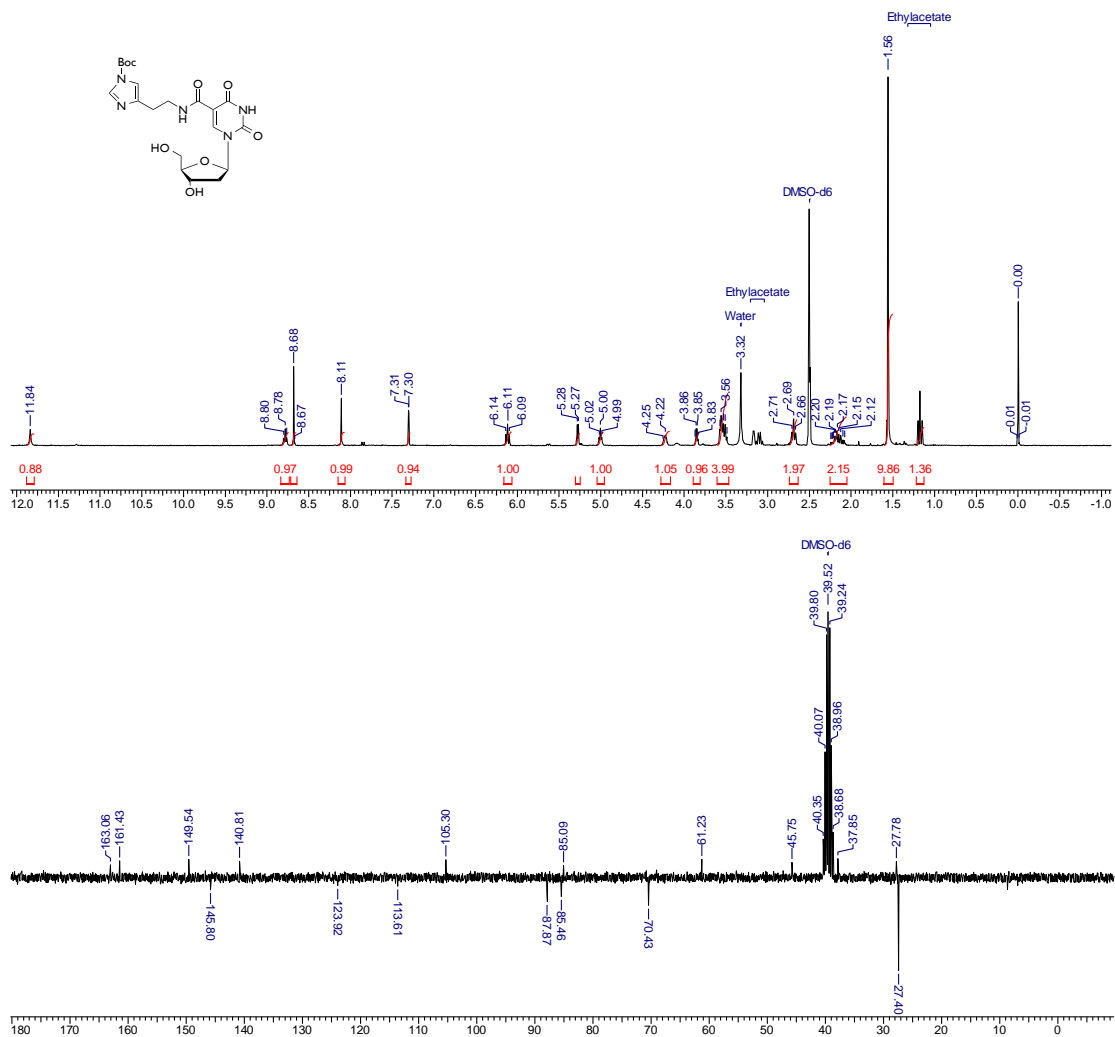

**Figure S1.** <sup>1</sup>H and <sup>13</sup>C spectrum of the T<sup>Im</sup> modified building block synthesis after the CO-insertion Pd-cross coupling reaction (25°C, 300MHz, (CD<sub>3</sub>)<sub>2</sub>SO-d<sub>6</sub>, traces of EtOAc and water).

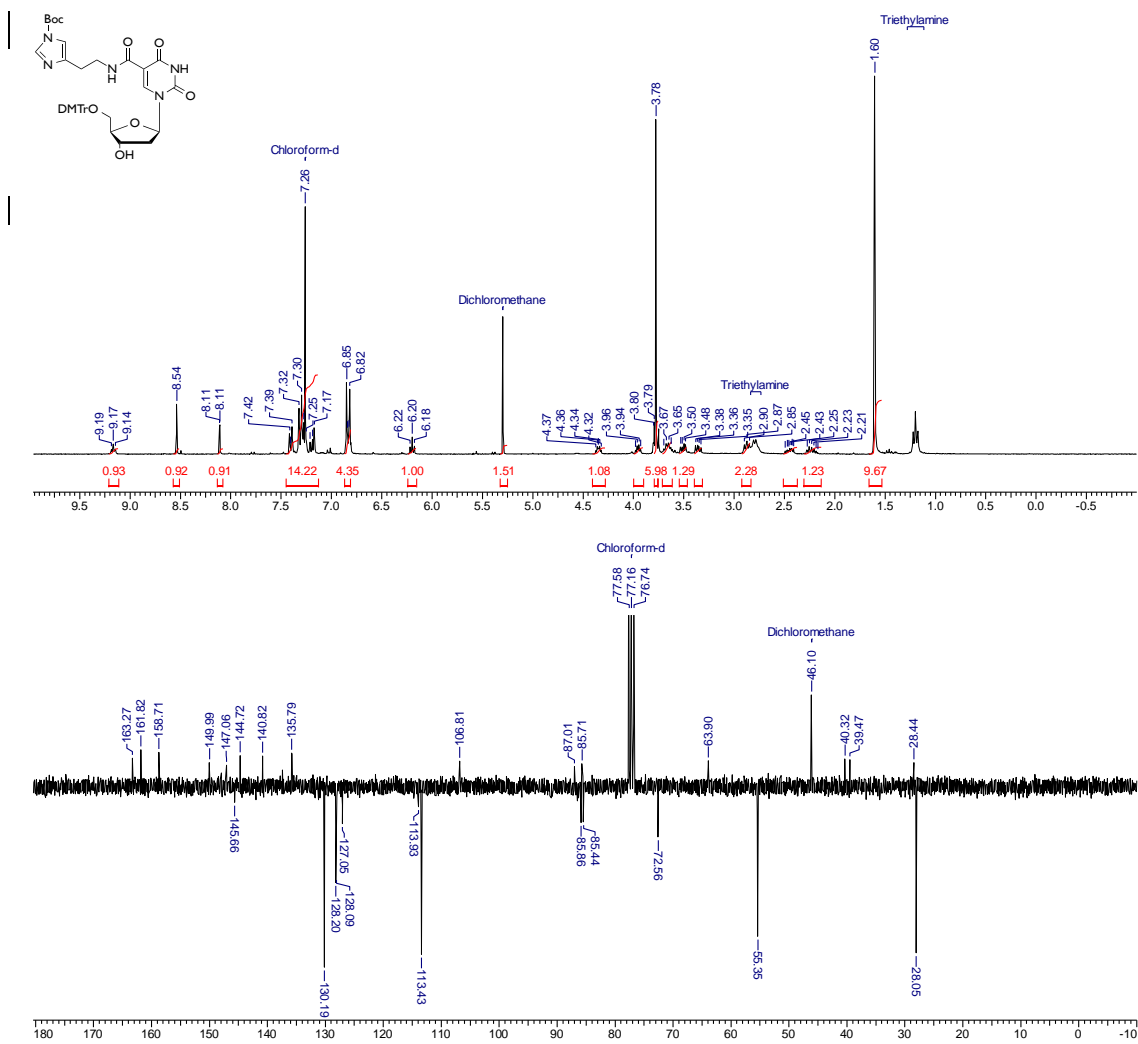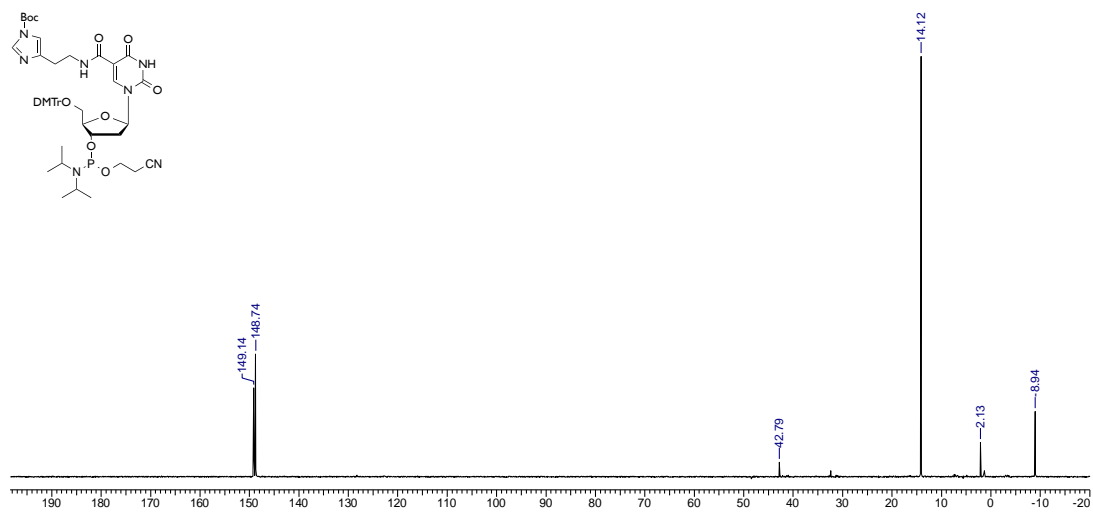

### ***Synthesis of $T_x^{lm}$ modified oligonucleotides.***

All oligonucleotides were synthesized DMTr-ON using an ABI 394 DNA synthesizer at 1  $\mu$ mol scale. Standard automated synthesis protocol was used except for coupling of the modified phosphoramidites. The synthesis column was removed from the automated DNA synthesizer for the manual coupling of the modified residues. For this introduction, 0.2 M solution of the modified phosphoramidite in dry acetonitrile (0.4 mL) and 0.1 M solution of DCI in dry acetonitrile (0.5 mL) were mixed together in a syringe and pushed in small portions (0.05 mL) over the reaction column (total coupling time 15 min.). The column was then re-installed on the synthesizer and automated synthesis was resumed.

The synthesized oligonucleotides were cleaved from solid support and deprotected by incubation at 55°C overnight in a concentrated aqueous ammonia solution. After cleavage and deprotection the samples were purified on SEP-PAK<sup>®</sup> C18 cartridges (obtained from Waters).

### ***Concentration determination.***

All experiments to determine the concentration of oligonucleotides were performed on a Trinean DropSense<sup>®</sup> 96 equipped with DropPlate<sup>®</sup> reader. Concentrations were calculated using the DropQuant<sup>®</sup> software.

### ***General assignment of all (non-) exchangeable $^1H$ resonances***

A first step in any NMR study is the assignment of the resonances of interest. Non-labile  $^1H$  resonances were assigned using the standard sequential assignment procedures. The imino protons have to be assigned separately. For all duplexes, the imino protons can be divided into three groups based on their chemical shifts: (i) guanine imino protons involved in G•C base-pairs resonating between 13.2 and 14.7 ppm, (ii) thymine imino protons involved in A•T base-pairs resonating between 12.3 and 13.1 ppm and (iii) the imino protons of the T•T mismatched base-pair resonating between 10 and 11.2 ppm. Since imino protons of adjacent base-pairs are constrained to be approximately 3.4 Å below or above one another in a B- DNA duplex, imino proton resonances can be assigned based on nOe contacts between imino protons of adjacent base-pairs.

A general overview of the imino region of the wild type sequence and the studied alternative sequences can be seen in figure S4. The corresponding names of the different sequences indicated next to their respective spectra refer to the base pairs altered with respect to the numbering in the original wild type sequence.

For all duplexes, all imino proton resonances were visible, apart from the G1 and G14 imino protons, belonging to the terminal base pairs. For the wild type duplex, two additional, unassigned resonances are visible at the lowest temperature, which can most likely be attributed to the imino protons of the terminal base pair, although it was not possible to make a definitive assignment based on the 2D NOESY spectra. However, since a similar pattern of nOe contacts can be observed for both imino proton resonances of the T•T mismatch, it is not possible to distinguish these two resonances from one another using the traditional imino assignment strategy based on 2D NOESY spectra. Therefore, the assignment of the imino protons of the mismatched base pair had to be accomplished via the site-specific incorporation of a partially  $^{15}N$ -labelled thymidine nucleotide, either at position T8 or T21. As was illustrated previously, such a site-specific, partial  $^{15}N$ -incorporation can aid the assignment of the labeled spins, while limiting the cost compared to a site-specific 100% enrichment. For the  $T_8^{lm}$  and  $T_{21}^{lm}$  duplexes, the  $^{15}N$ -labelled nucleotide was incorporated opposite the chemically modified nucleotide, at positions T21 and T8 respectively. For the  $T_6^{lm}$  and  $T_7^{lm}$  duplexes, position T<sub>8</sub> was arbitrarily chosen for the incorporation of the  $^{15}N$ -labelled nucleotide.

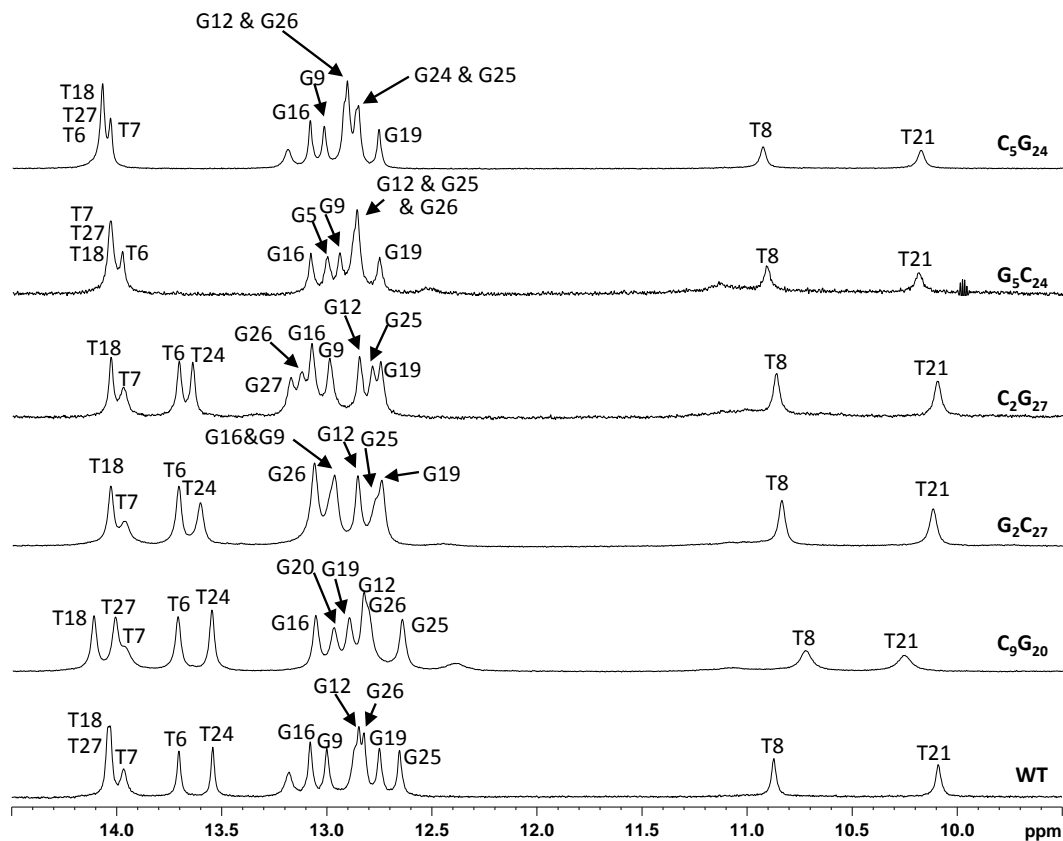

**Figure S4.** Overview of the  $^1\text{H}$  imino region of the wild type sequence (wt) and the proposed alternative sequences. The corresponding names of the different sequences indicated next to their respective spectra refer to the base pairs altered with respect to the numbering in the original wild type sequence.

***Naming conventions of figures in supplementary material***

Since all data was recorded at pD 5.0 and all the pKaH-values are found to be higher than 7.7, the duplexes feature an imidazolium-group which is indicated explicitly in all subsequent figures by the use of TxImH+.

***Chemical shift perturbation overview of all modified  $T_x^{\text{Im}}$  duplexes***

In the following figures (S5 – S11) the chemical shift perturbation of each modified  $T_x^{\text{Im}}$  duplex with respect to the corresponding non-modified template sequence are shown, both for the exchangeable imino protons as for the non-exchangeable sugar and aromatic base protons. In each case, the spectra used for the perturbation mapping of the imino protons are measured at 5°C and pH 5.0 in  $\text{H}_2\text{O}/\text{D}_2\text{O}$  90%/10%. In a similar fashion, the perturbation mapping of the non-exchangeable protons is performed using data recorded at 25°C and pD 5.0 in 100%  $\text{D}_2\text{O}$ .

## T<sub>6</sub><sup>Im</sup> modified duplex

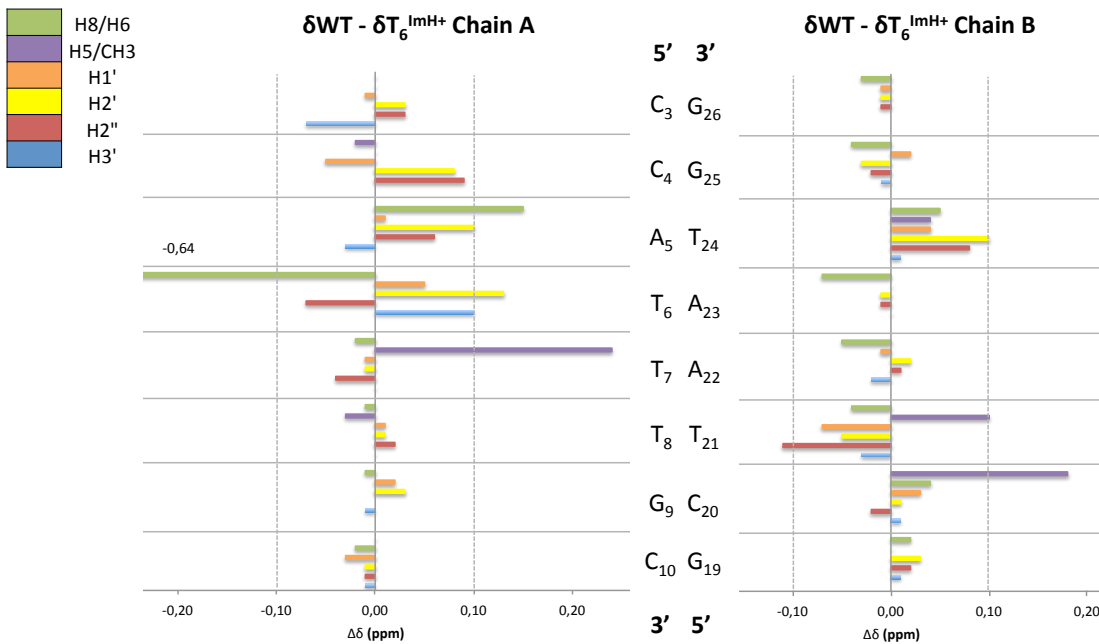

**Figure S5.** Chemical shift perturbation of the imino (grey, top) and non-exchangeable protons of the T<sub>6</sub><sup>Im</sup> duplex with respect to the wild type sequence (bottom).

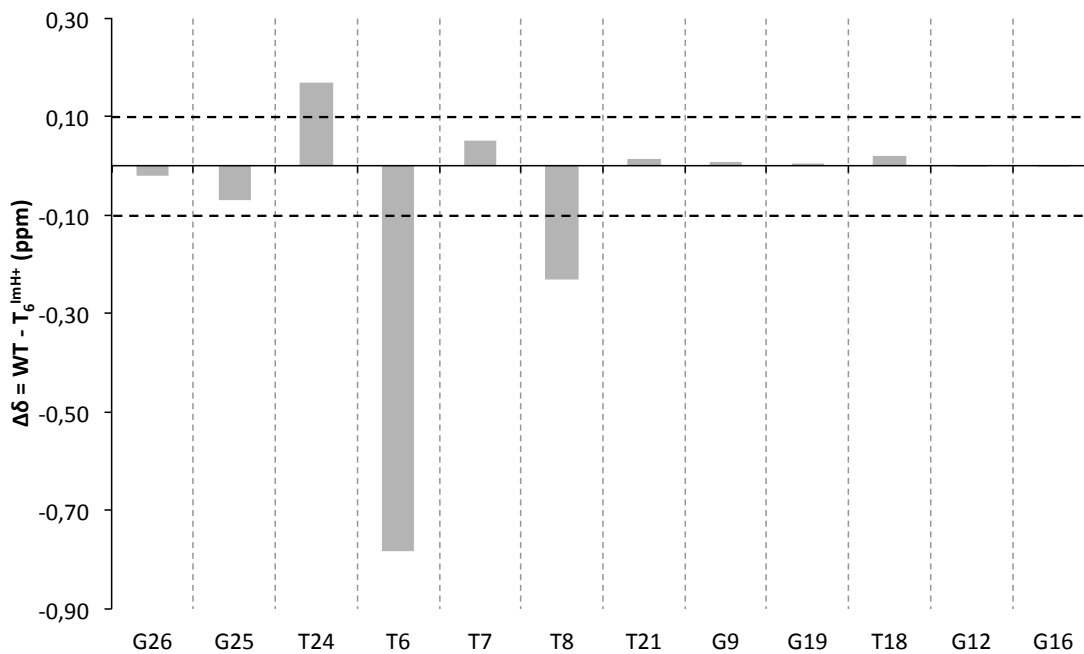



## T<sub>7</sub><sup>Im</sup> modified duplex

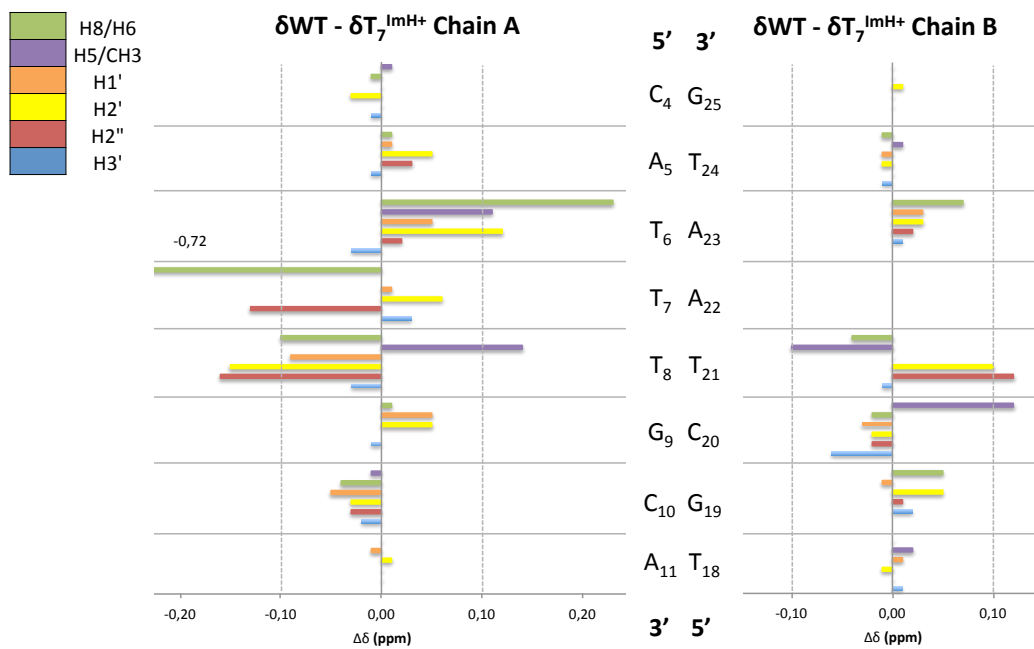

**Figure S6.** Chemical shift perturbation of the imino (grey, top) and non-exchangeable protons of the T<sub>7</sub><sup>Im</sup> duplex with respect to the wild type sequence (bottom).

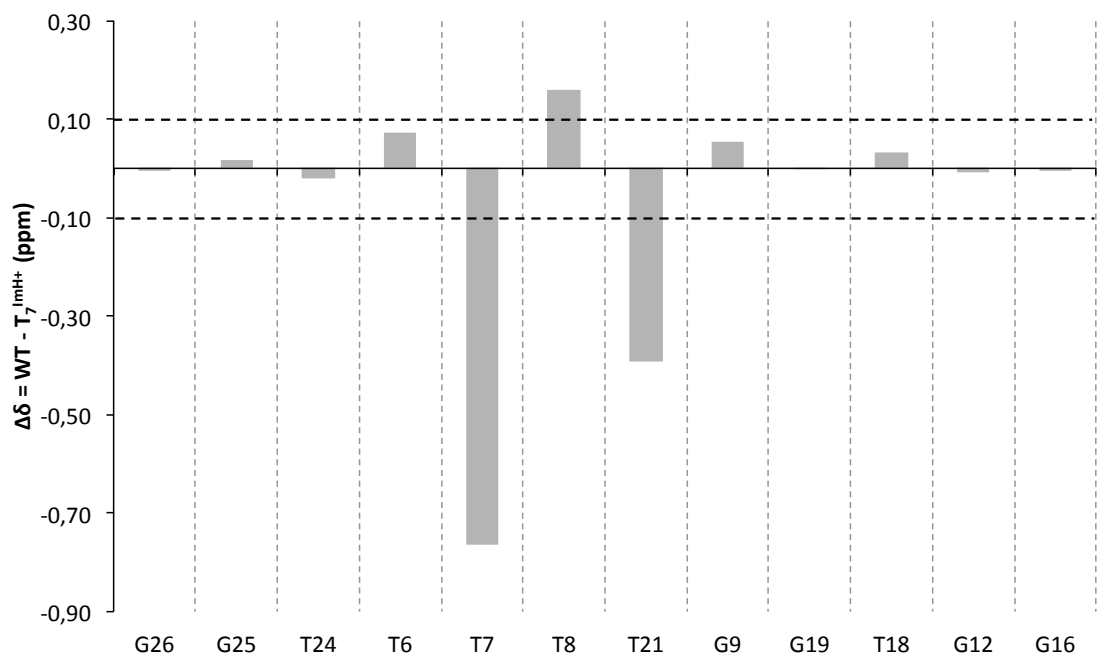

## $T_{21}^{Im}$ modified duplex

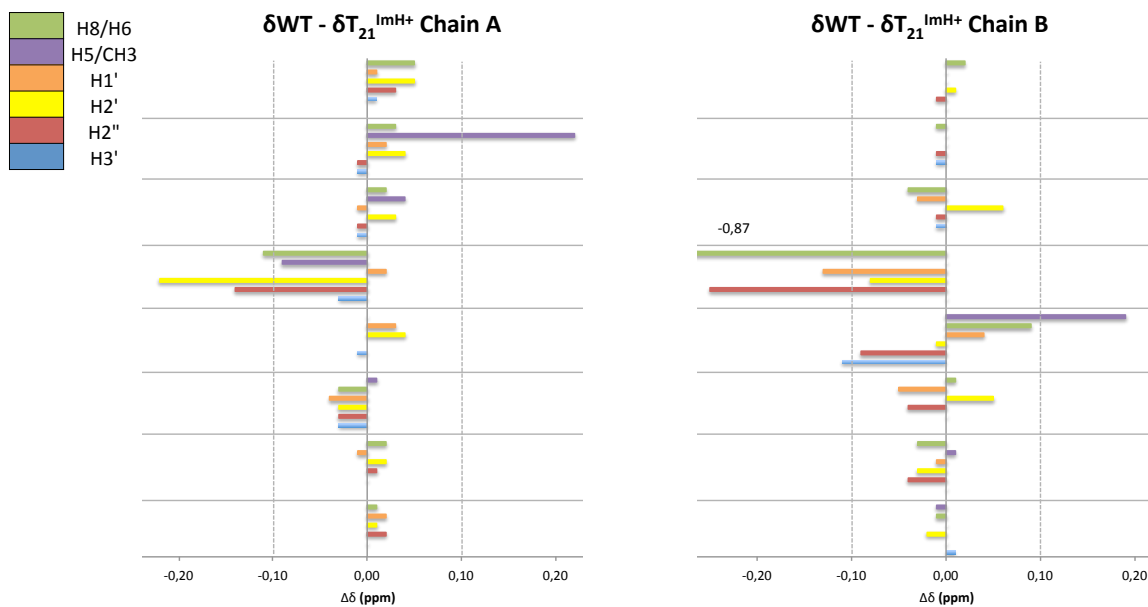

**Figure S7.** Chemical shift perturbation of the imino (grey, top) and non-exchangeable protons of the  $T_{21}^{Im}$  duplex with respect to the wild type sequence (bottom).

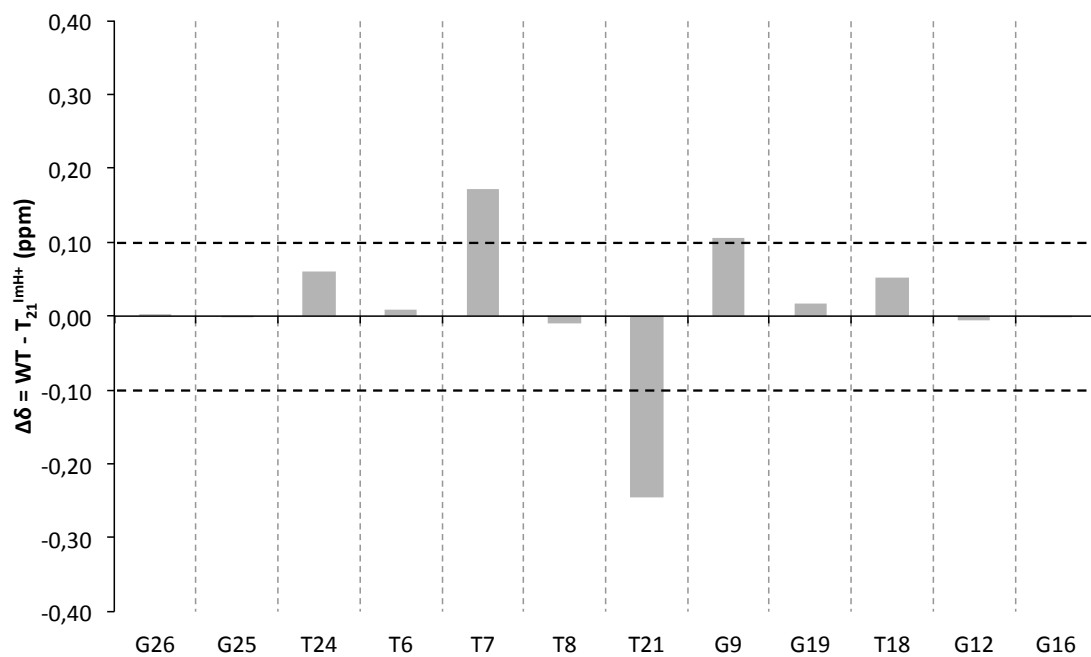

### $T_8^{Im}$ modified duplex

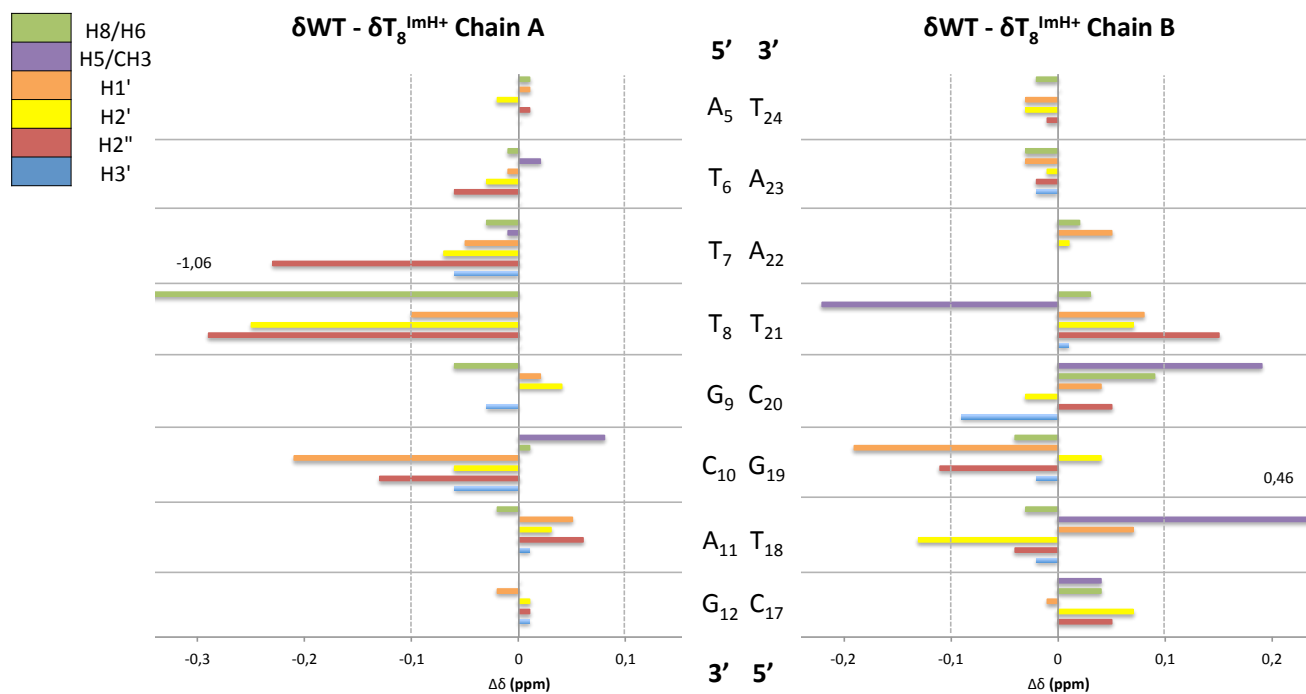

**Figure S8.** Chemical shift perturbation of the imino (grey, top) and non-exchangeable protons of the  $T_8^{Im}$  duplex with respect to the wild type sequence (bottom).

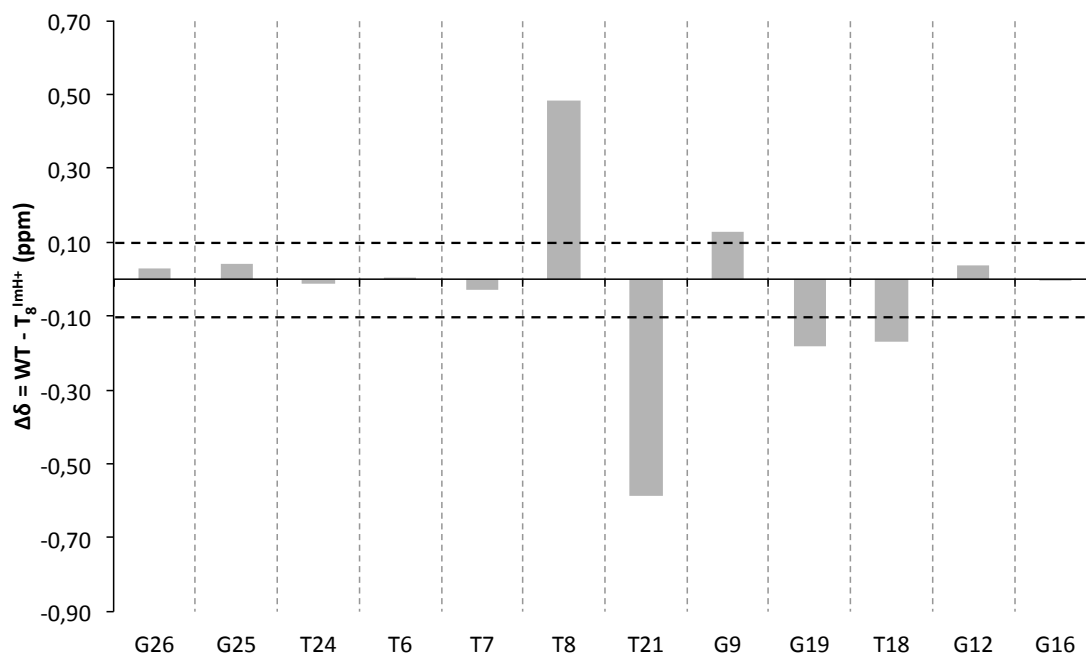

### $T_8^{Im}A_{21}$ modified duplex

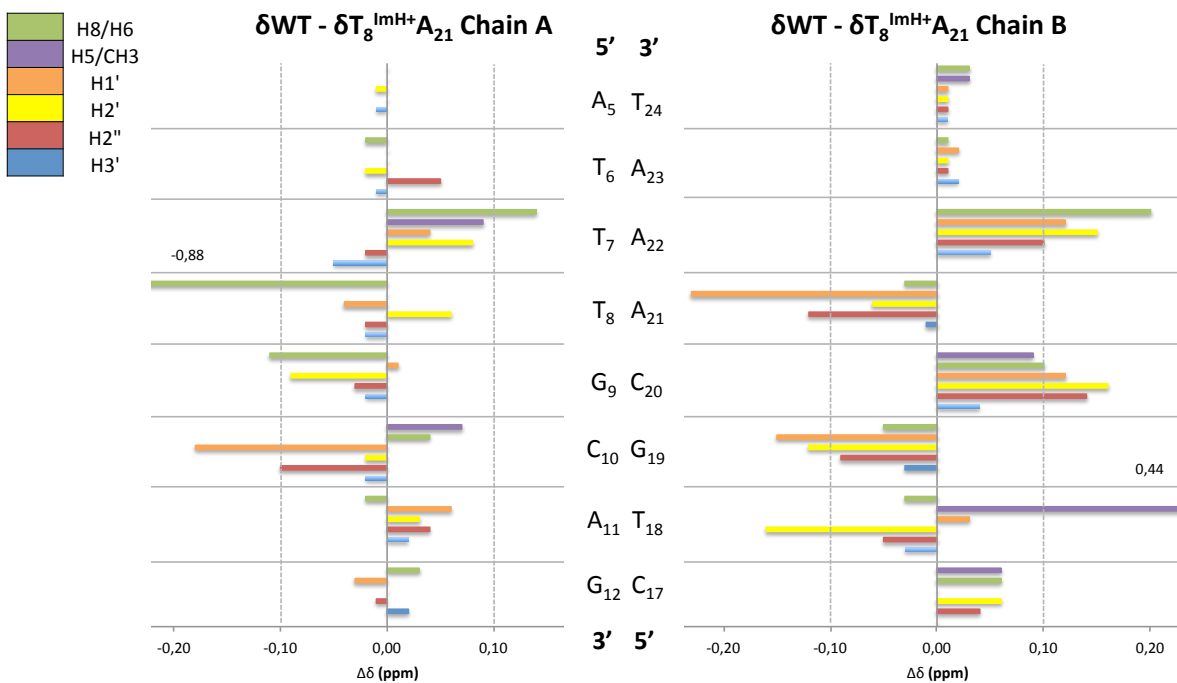

**Figure S9.** Chemical shift perturbation of the imino (grey, top) and non-exchangeable protons of the  $T_8^{Im}A_{21}$  duplex with respect to the T8A21 wild type sequence (bottom).

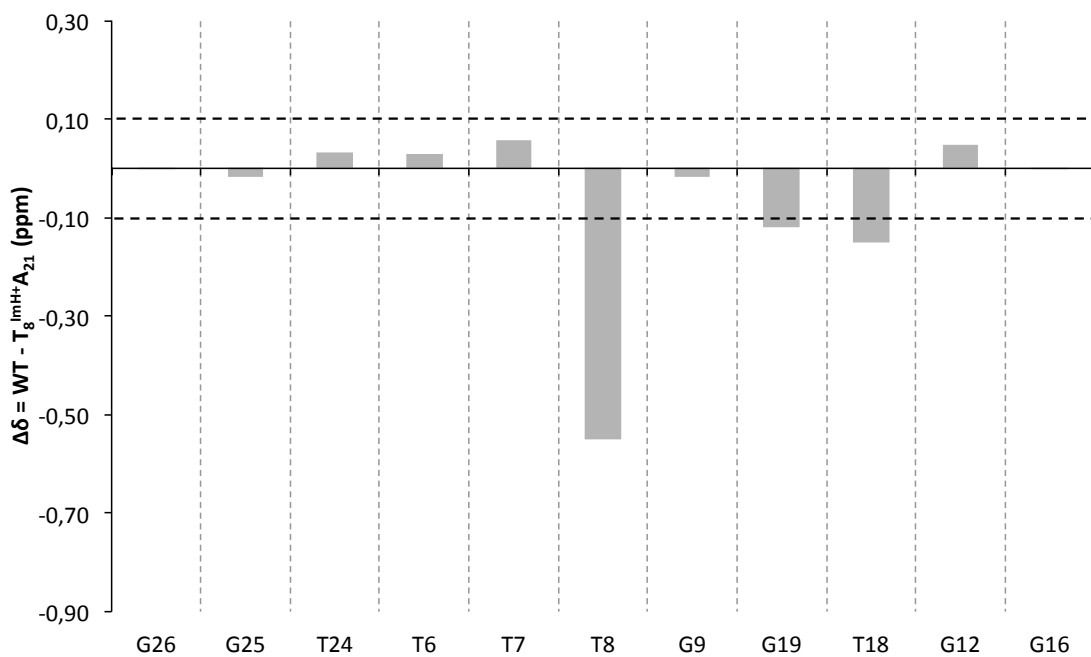

**sT<sub>21</sub><sup>Im</sup> modified duplex**

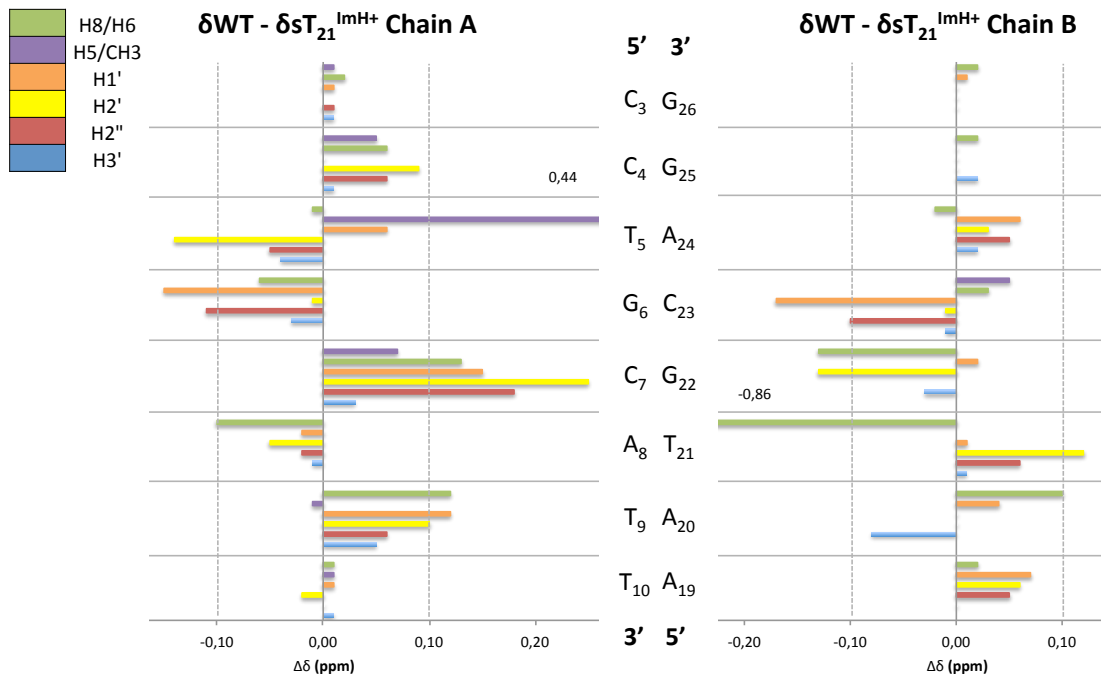

**Figure S10.** Chemical shift perturbation of the imino (grey, top) and non-exchangeable protons of the sT<sub>21</sub><sup>Im</sup> duplex with respect to the sT<sub>21</sub> wild type sequence (bottom).

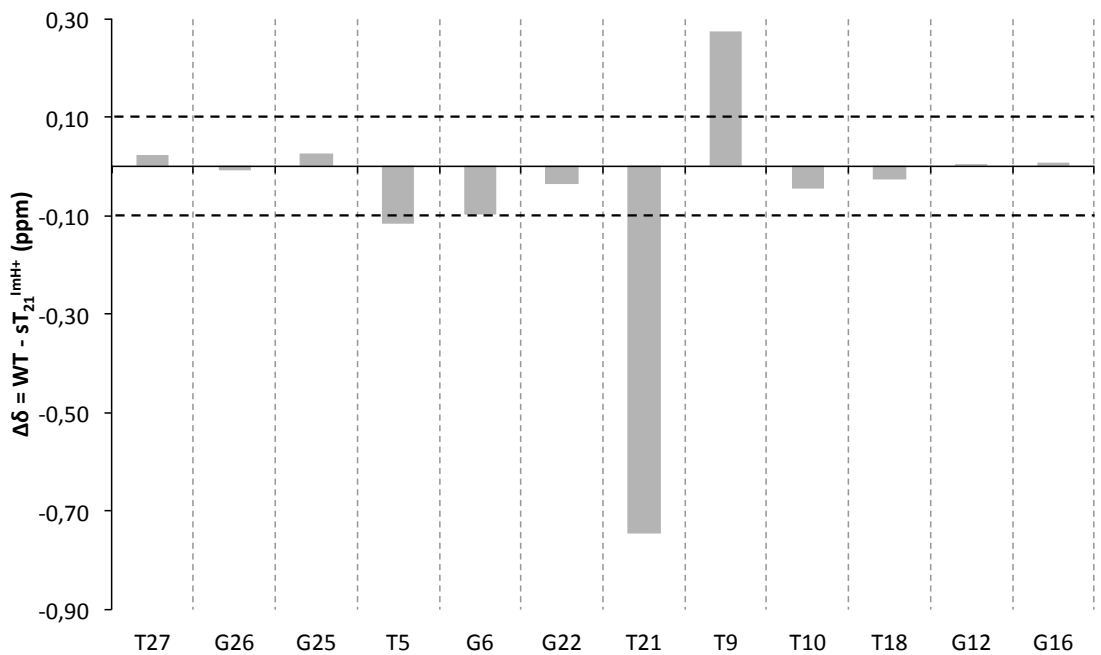

# $A_8T_{21}^{Im}$ modified duplex

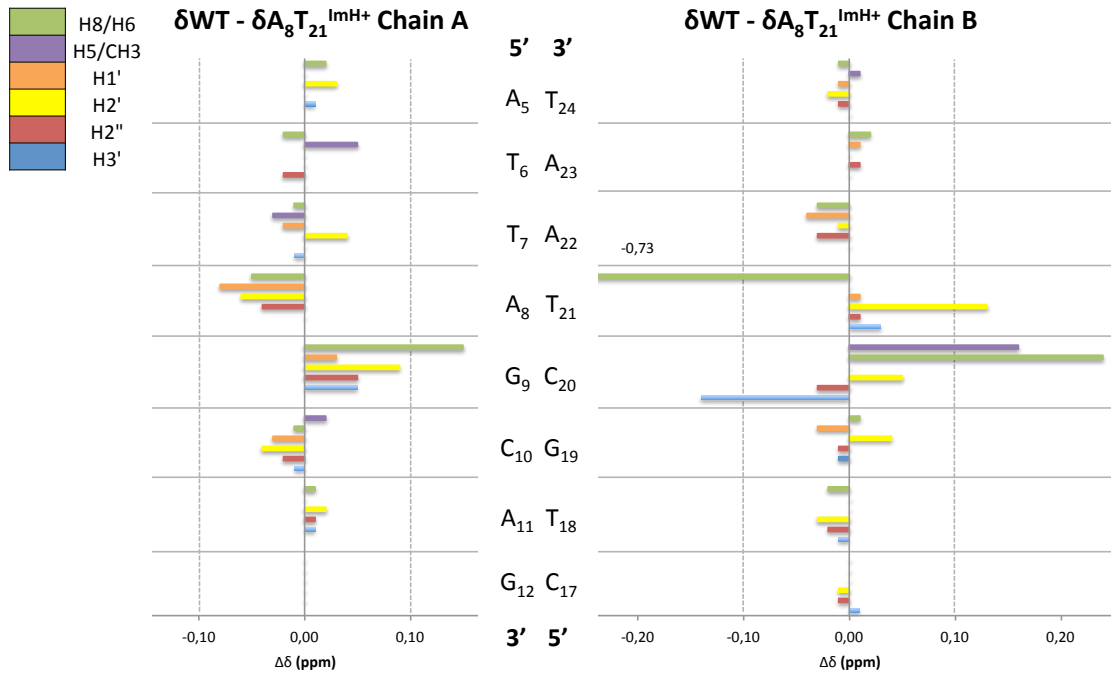

**Figure S11.** Chemical shift perturbation of the imino (grey, top) and non-exchangeable protons of the  $A_8T_{21}^{Im}$  duplex with respect to the  $A_8T_{21}$  wild type sequence (bottom).

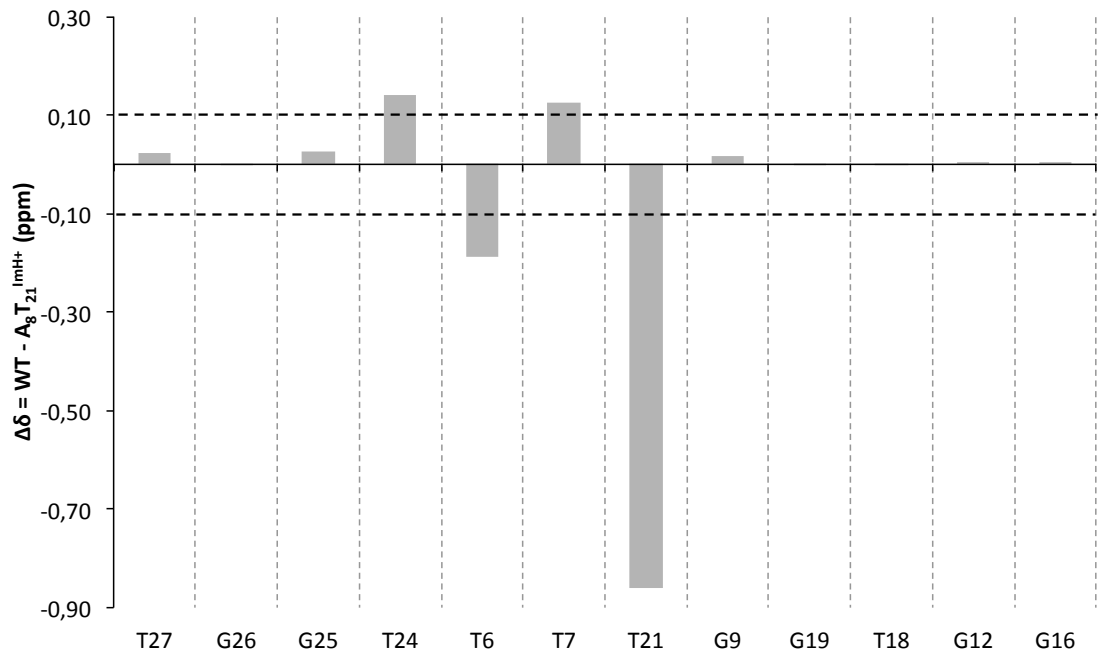

***Pka<sub>H</sub>-regulating motif in T<sub>8</sub><sup>Im</sup>A<sub>21</sub> and sT<sub>21</sub><sup>Im</sup>***

In figure S12 – S13, structural snapshots corresponding with the most persistent hydrogen bond conformations from the molecular dynamics run of both the T<sub>8</sub><sup>Im</sup>A<sub>21</sub> and sT<sub>21</sub><sup>Im</sup> duplexes are shown

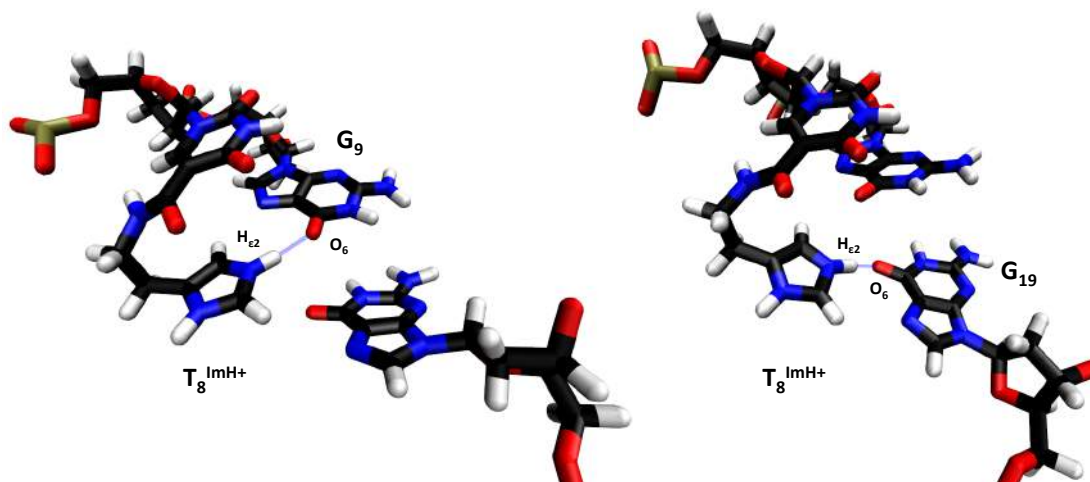

**Figure S12.** Main conformations with an intact hydrogen bond motif for the T<sub>8</sub><sup>Im</sup>A<sub>21</sub> duplex. In both cases the carbonyl O<sub>6</sub> atom from G<sub>9</sub> and G<sub>19</sub> respectively are the main hydrogen bond acceptors and Hε1 of the modified T<sub>8</sub><sup>ImH+</sup> base the hydrogen bond donor.

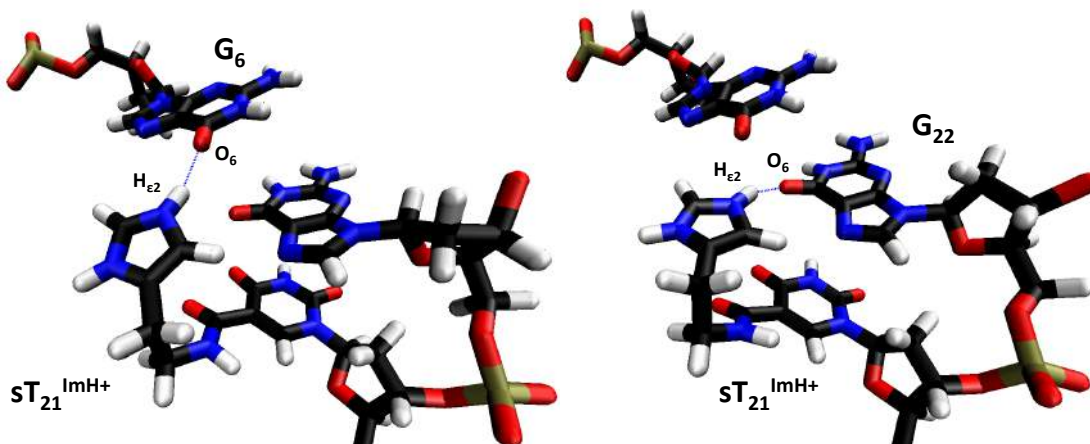

**Figure S13.** Main conformations with an intact hydrogen bond motif for the sT<sub>21</sub><sup>Im</sup> duplex. In both cases the carbonyl O<sub>6</sub> atom from G<sub>9</sub> and G<sub>19</sub> respectively are the main hydrogen bond acceptors and Hε1 of the modified T<sub>21</sub><sup>ImH+</sup> base the hydrogen bond donor.

### Validation molecular dynamics trajectory: wild type and $T_8^{Im}$

During the trajectory analysis, both 5' and 3' outer ends of each DNA strand will not be taken into account since these ends have a tendency to fraying and hence are prone to show atypical conformational behaviour. In addition, when a T-T mismatch is present in the DNA duplex, no preferential wobble base pair is imposed on the starting structure, meaning at the start of every trajectory, the system is free to choose which wobble conformation it will adopt.

Considering the sampling of the conformational  $\alpha/\gamma$  space, Várnai and Hartmann have shown that three combinations of  $\alpha/\gamma$  correspond to local energy minima: g+/g- (canonical), g-/t and g+/t in their respective order of decreasing stability for free B-DNA structures. Other non-canonical  $\alpha/\gamma$  conformations are predominantly found in protein-DNA complexes and hence represent higher-energy states, which are not freely accessible for DNA in solution.

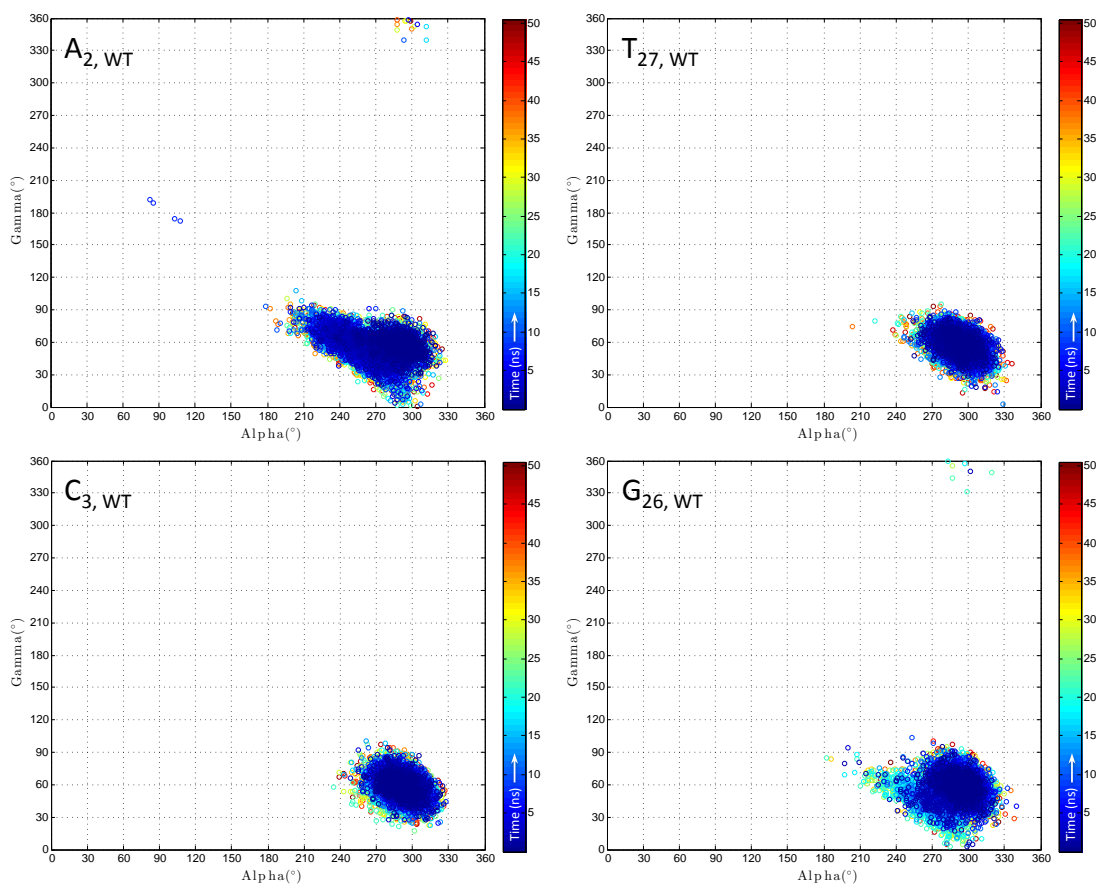



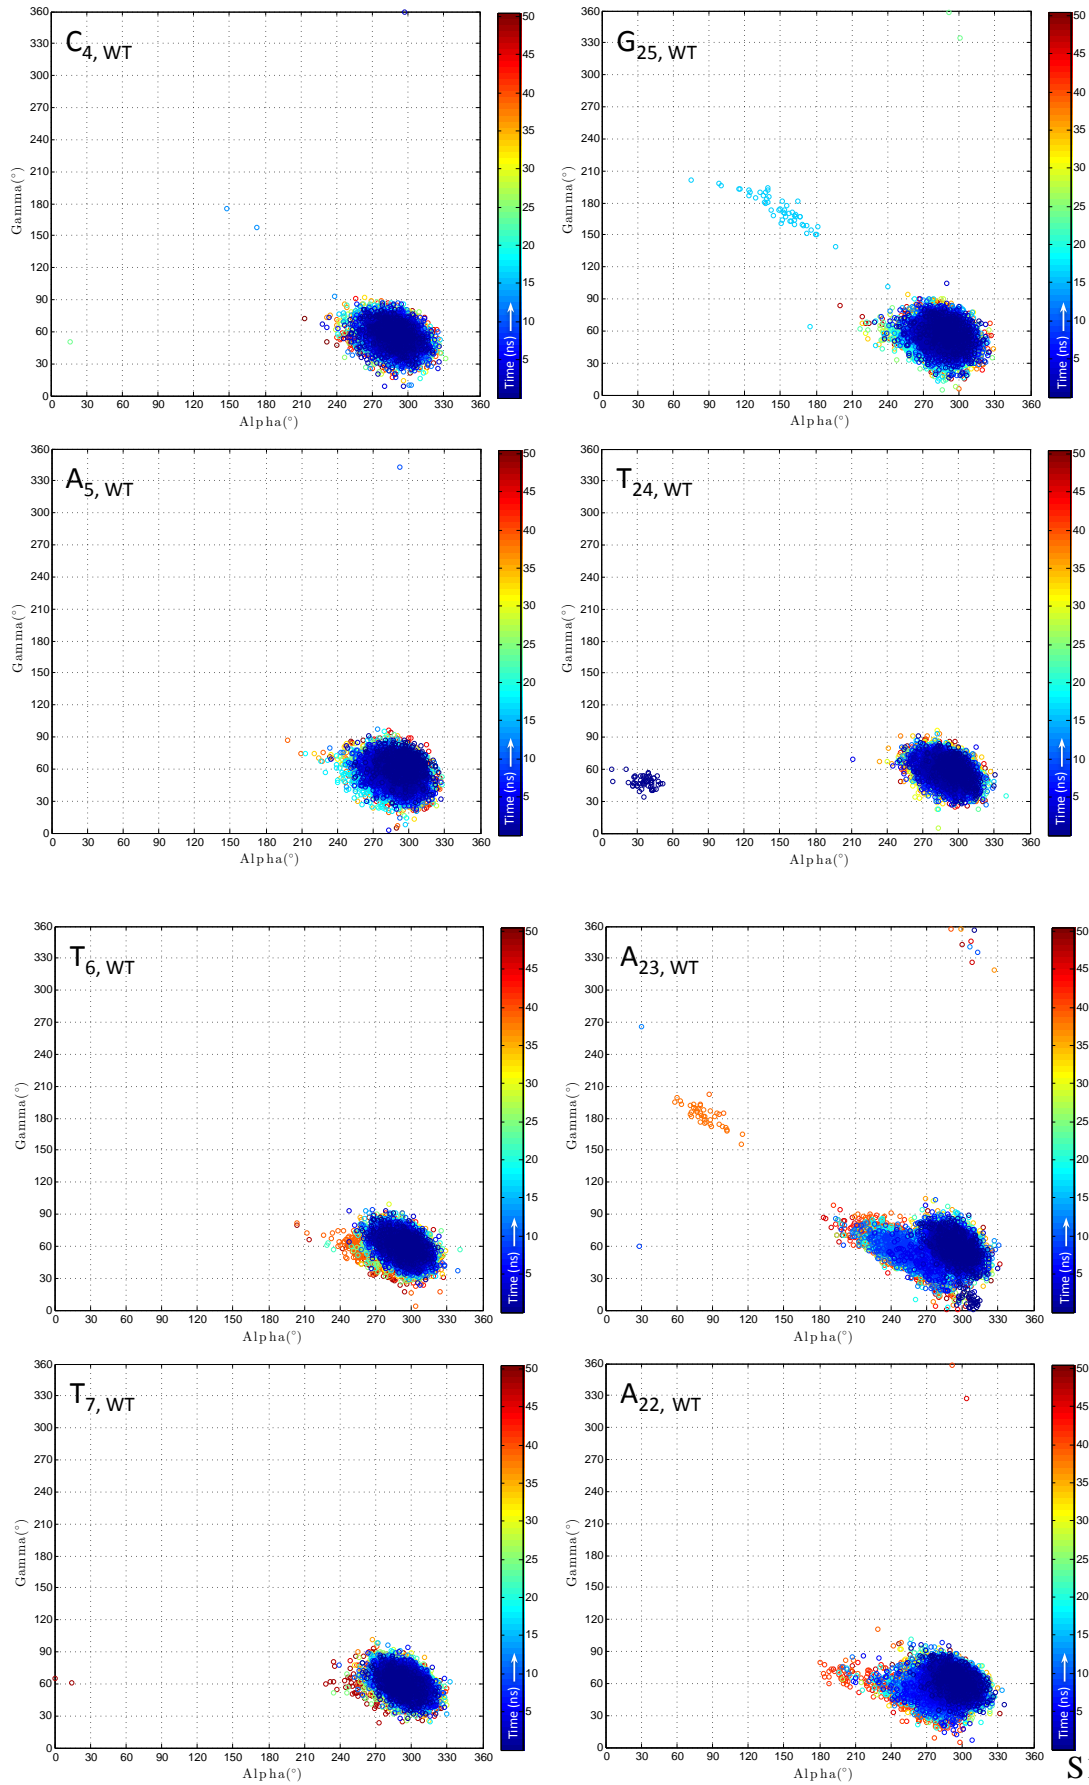

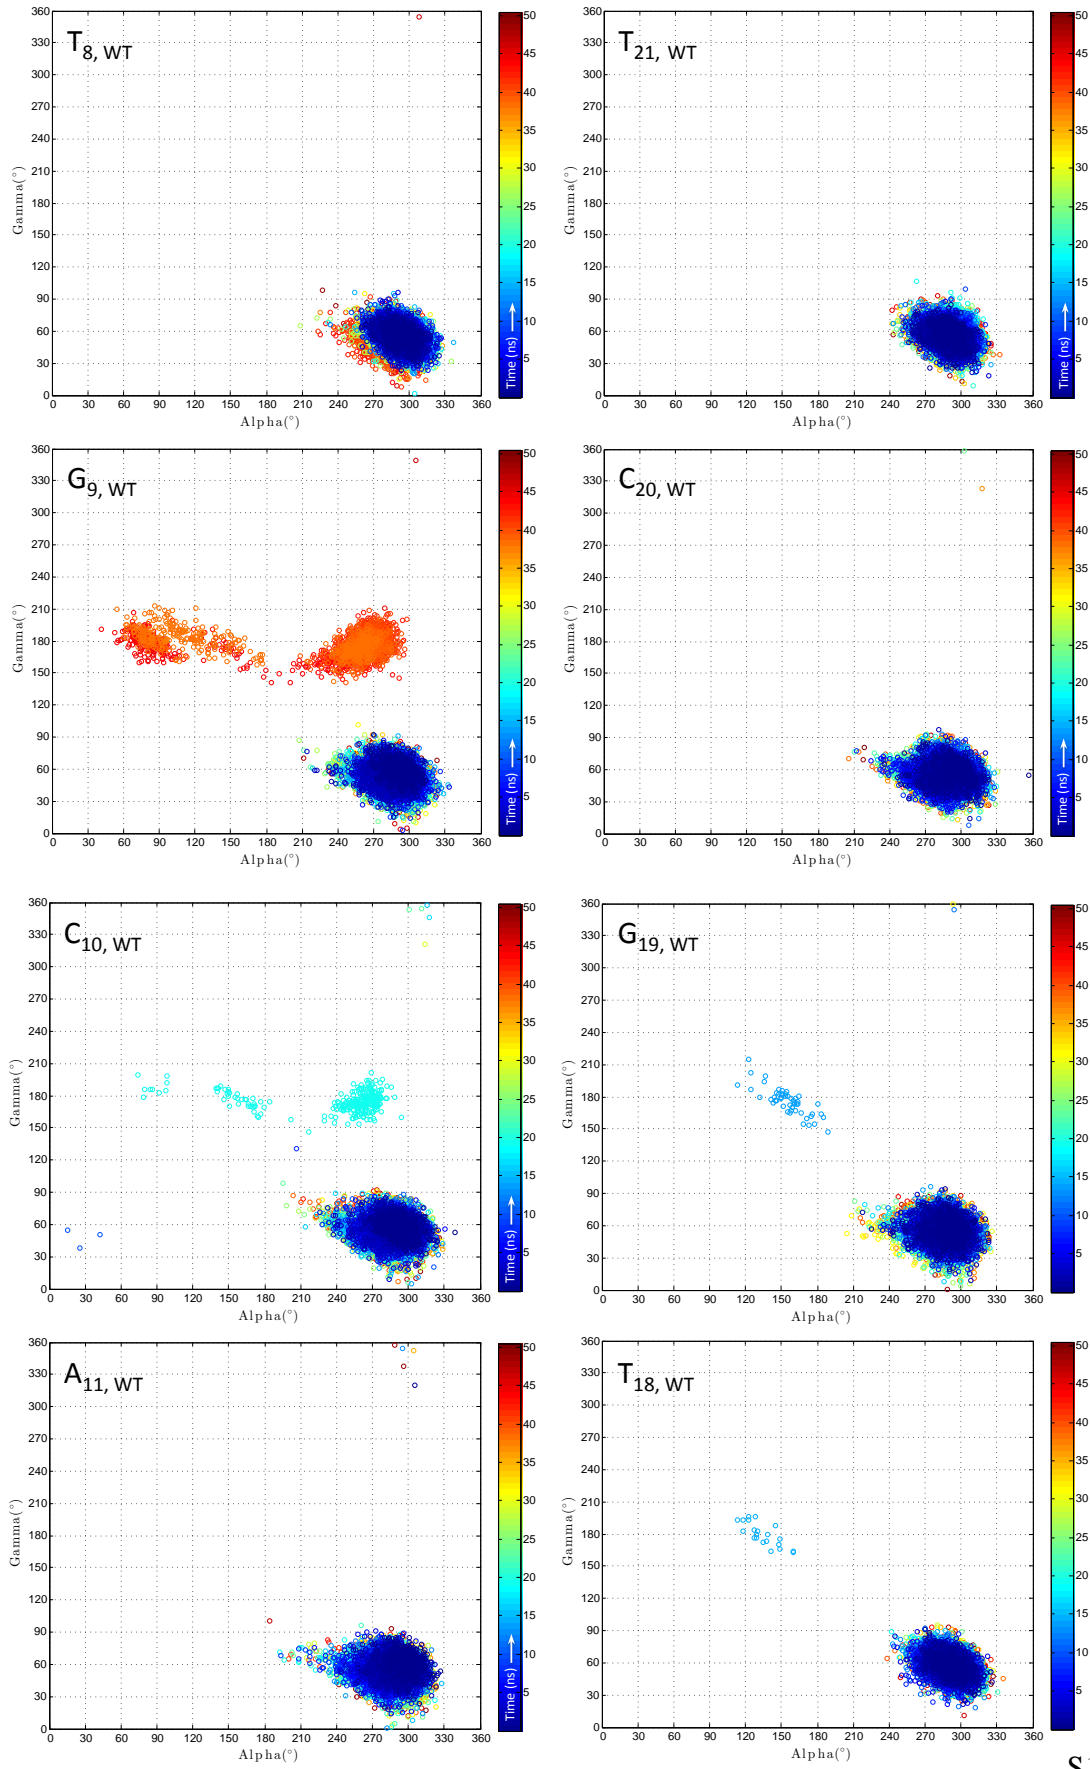

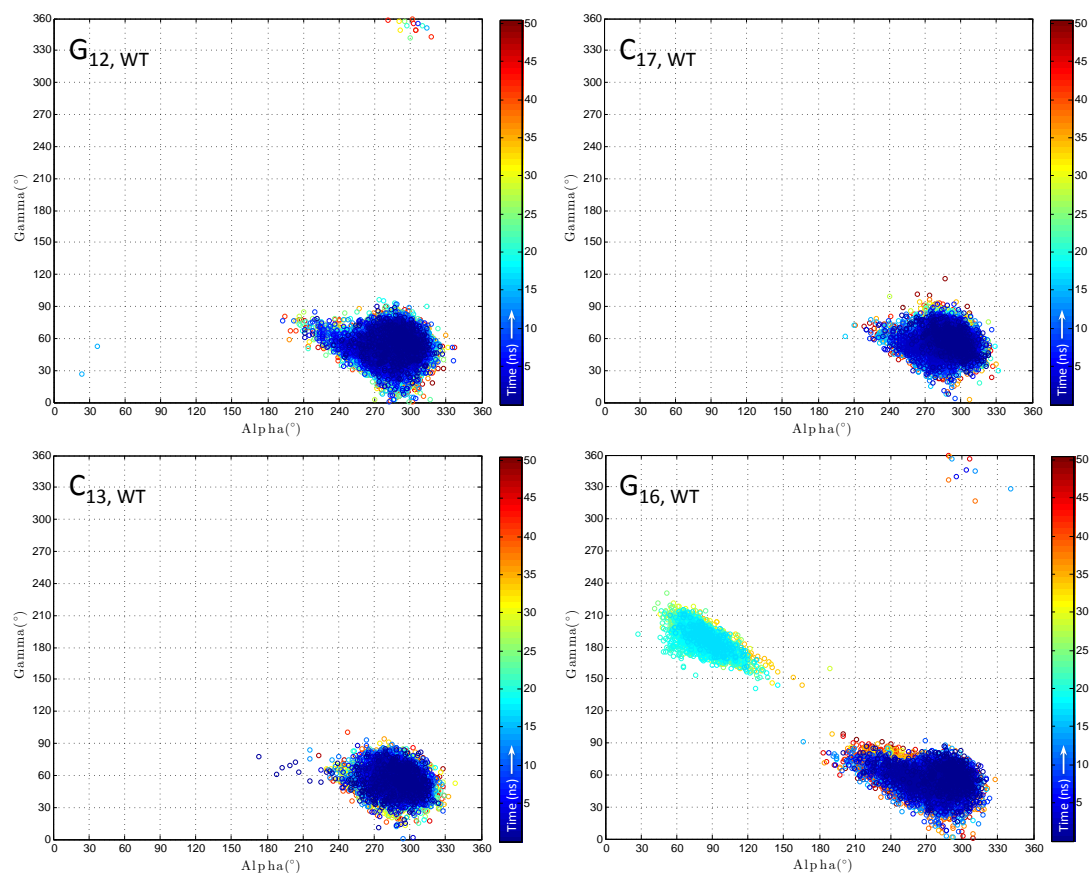

**Figure S14.**  $\alpha/\gamma$  sampling of the equilibration and production molecular dynamics trajectory of the wild type duplex for a total period of 50,120ns. Each data point corresponds with a snapshot every 2ps. All base pairs are shown except for the 5' and 3' ends.

For the wild type sequence, it may be clear that for all the relevant base pairs, the majority of the conformations are located in the  $\alpha/\gamma \approx g^-/g^+ \approx (300^\circ, 30^\circ)$  energy minimum. In addition, the  $G_9$  base also samples both the  $g^+/t$  and  $g^-/t$  local minima, characterized by higher-energy than the global minima, near the end of the trajectory. To a minor extent,  $G_{16}$  also shows this behaviour although here a higher mobility is not unexpected due to the close presence to one of the duplex ends.

This observation by and large remains true for the same base pairs of the  $T_8^{lm}$  modified duplex, with two main differences for  $T_7$  and  $G_9$ . First off, where  $T_7$  in the wild type sequence only populates the  $g^+/g^+$  global minimum, the  $g^-/t$  local minimum is now also significantly populated. Furthermore this transition is reversible. With  $G_9$  as well, a reversible transition from  $g^-/g^+$  to  $g^+/t$  for a short duration of time can be observed. In addition, where with  $G_9$  in the wild type sequence both local minima are sampled, this is no longer the case for  $G_9$  in  $T_8^{lm}$ , during the simulated time window. Interestingly enough, no significant differences can be observed for  $T_8$  of  $T_8^{lm}$  duplex with respect to  $T_8$  base in the wild type sequence.

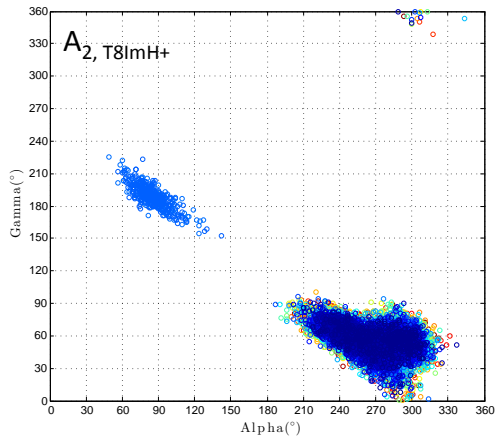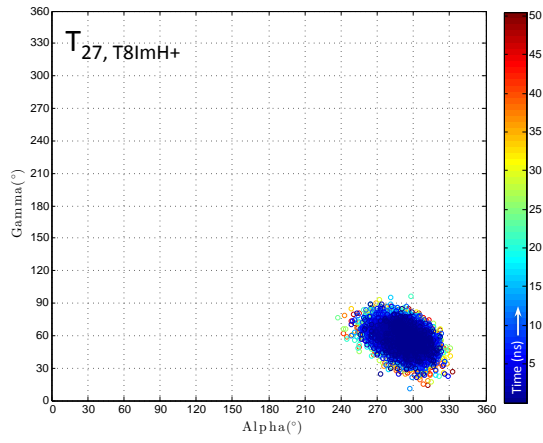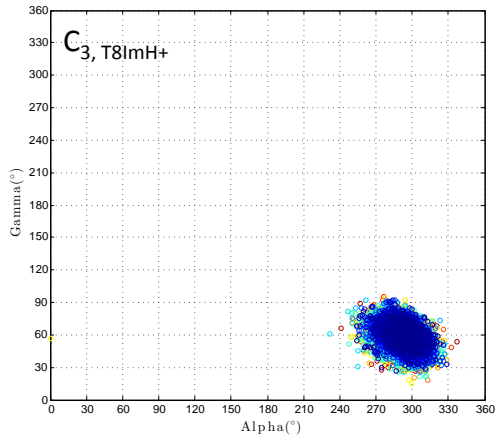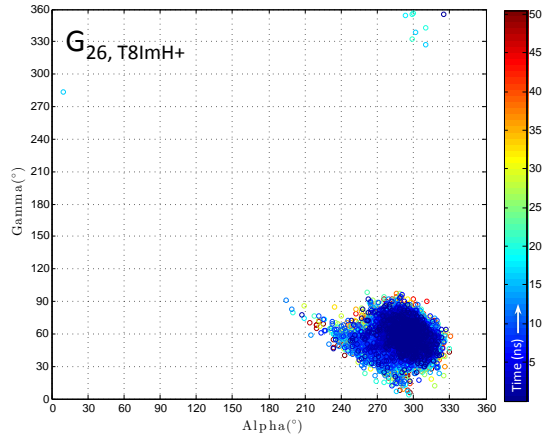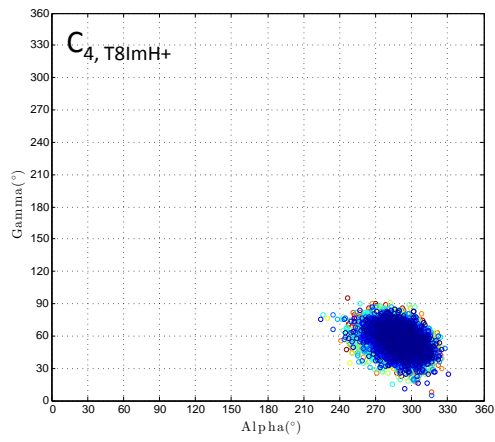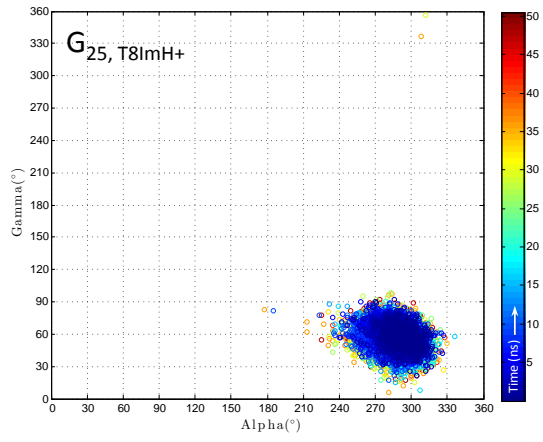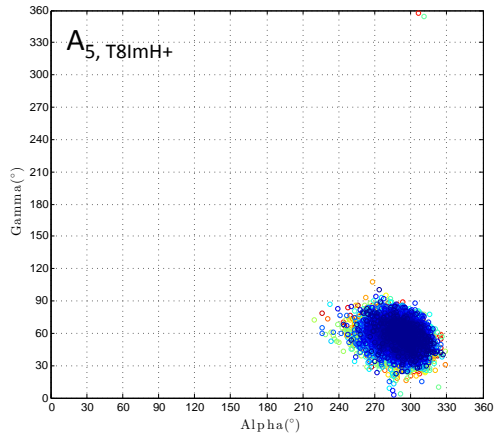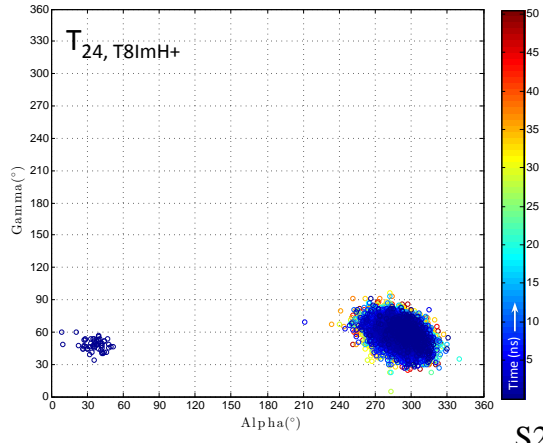

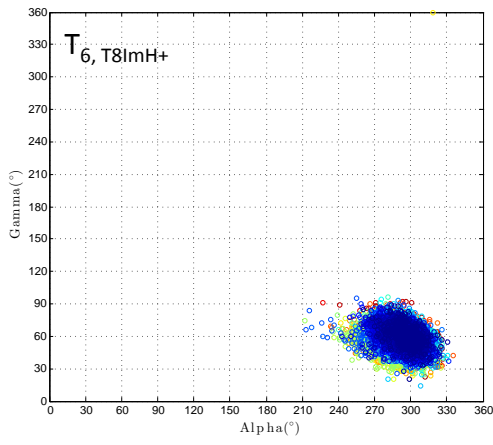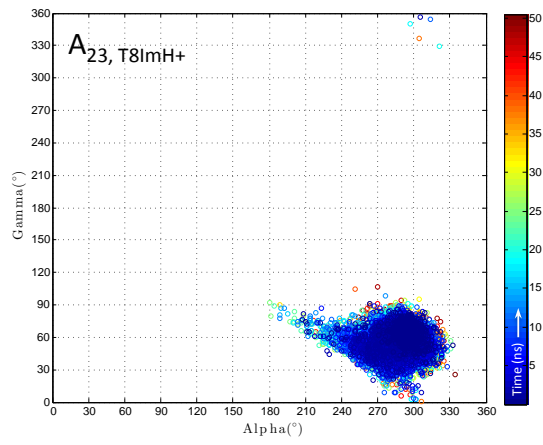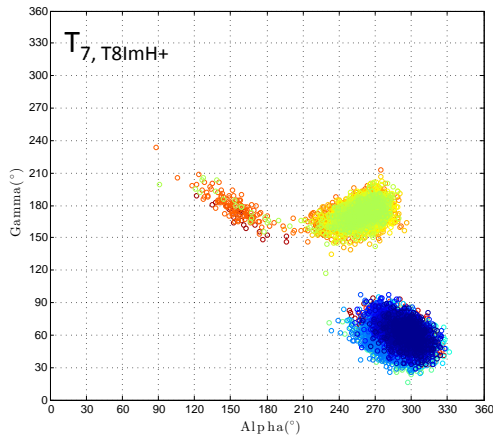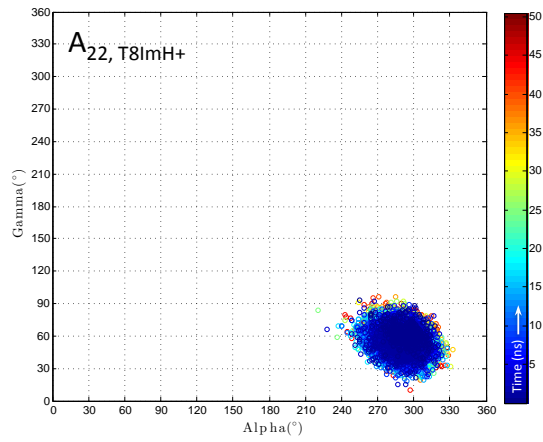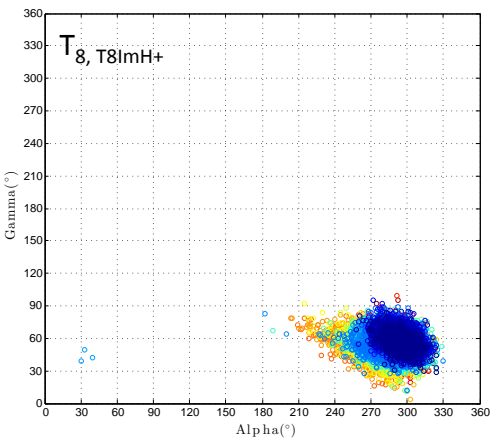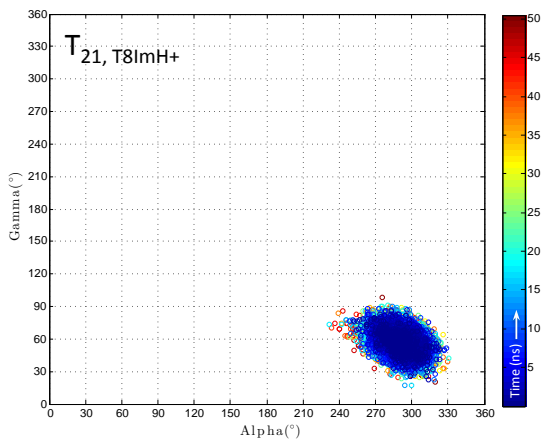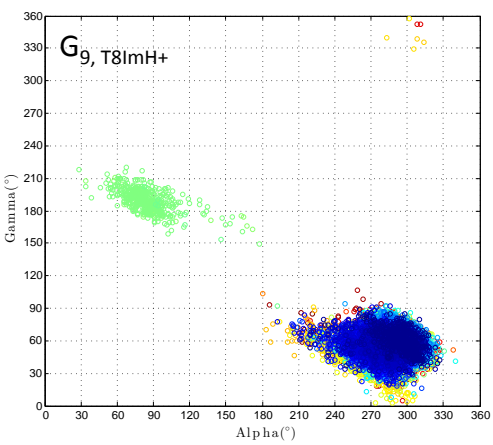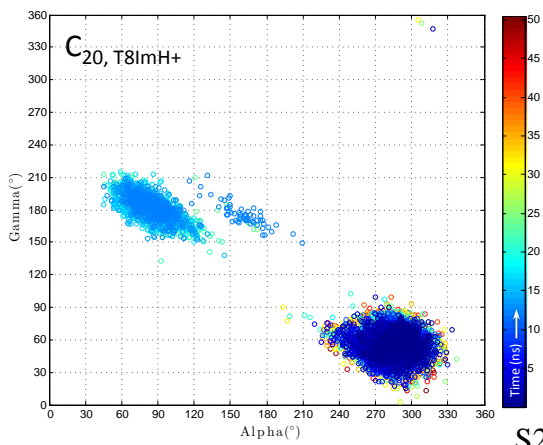

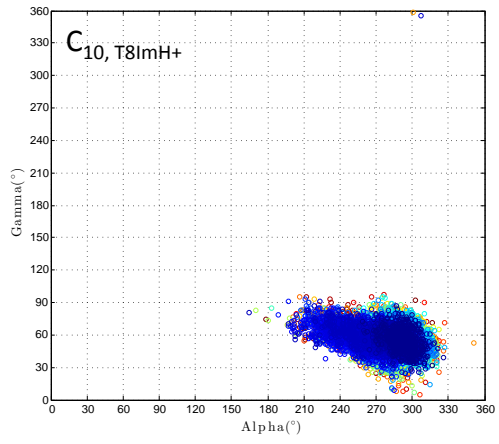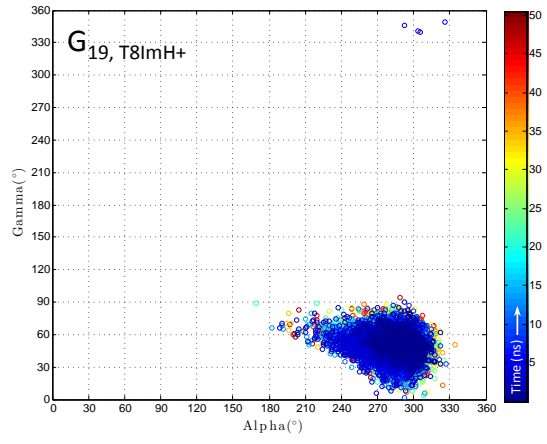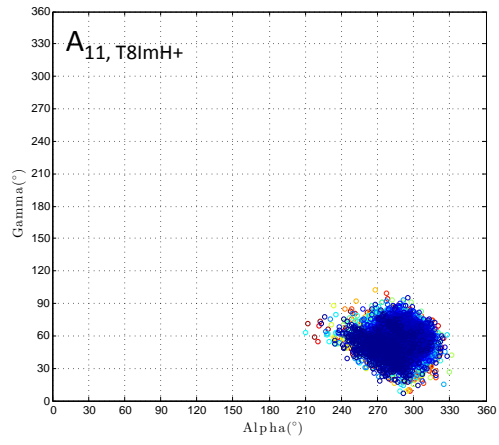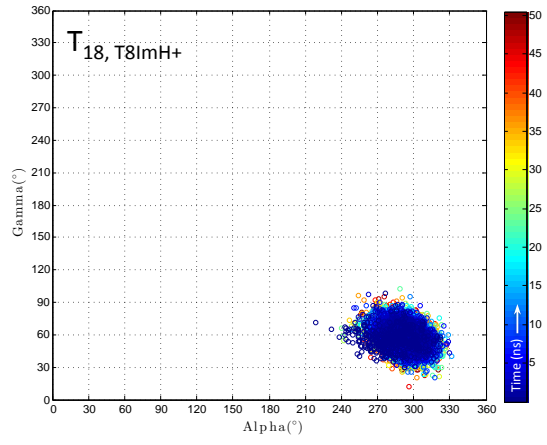

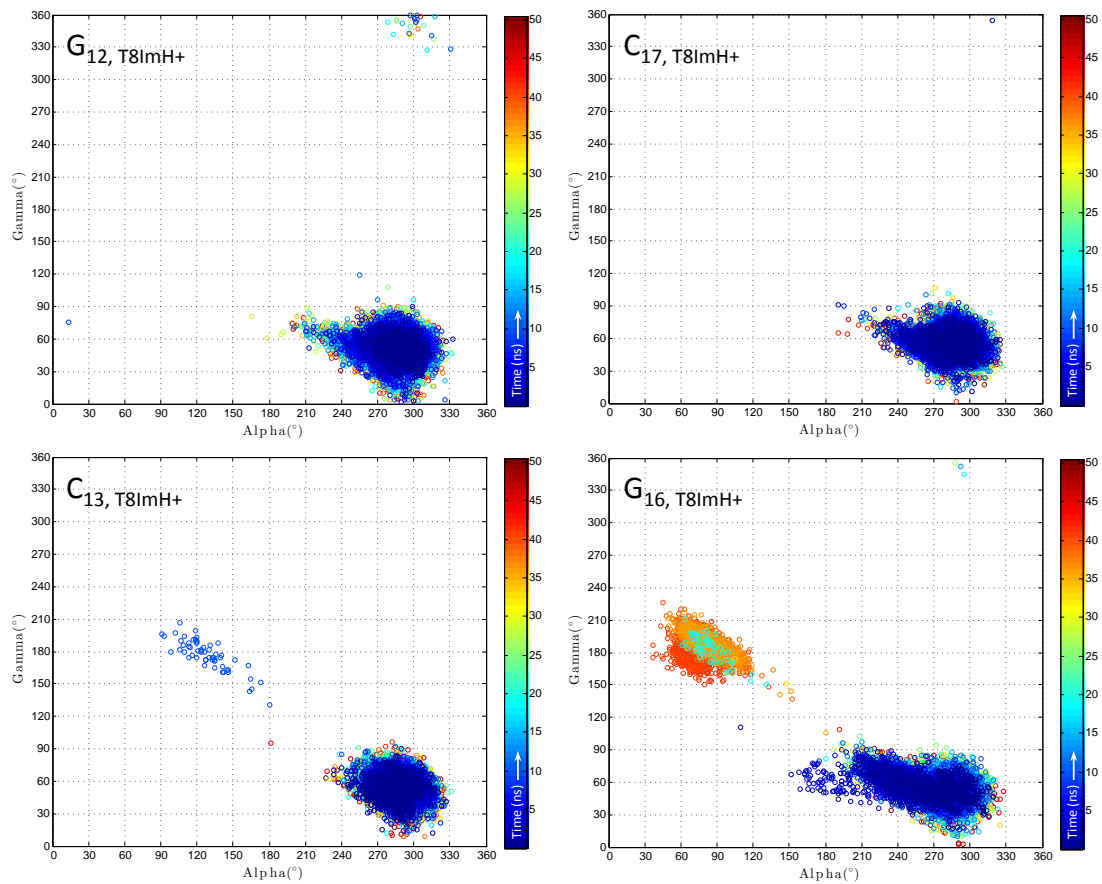

**Figure S15.**  $\alpha/\gamma$  sampling of the equilibration and production molecular dynamics trajectory of the  $T_8^{\text{Im}}$  duplex for a total period of 50,120ns. Each data point corresponds with a snapshot every 2ps. All base pairs are shown except for the 5' and 3' ends.

Secondly, the  $B_I/B_{II}$  conformations control the phosphate positions, influence groove parameters, stacking properties and helicoidal parameters. In general, the lower energy  $B_I$  state is characterized by  $\varepsilon/\zeta$ : t/g with  $\varepsilon-\zeta \approx -90^\circ$  and is predominantly found in the canonical B-DNA duplex.  $B_{II}$  on the other hand can be identified by  $\varepsilon/\zeta$ : g-/t with  $\varepsilon-\zeta \approx +90^\circ$  and is slightly less favoured. The angular histograms shown in figure. S16 – S17 show for all nucleotides from both the wild type and  $T_8^{lm}$  duplex the corresponding  $B_I/B_{II}$  torsional parameter ( $\varepsilon-\zeta$ ). Concerning the wild type, every nucleotide resides for the majority of the trajectory in the  $B_I$  conformation. Only  $G_{19}$  populates for a small but significant time period the  $B_{II}$  conformation.

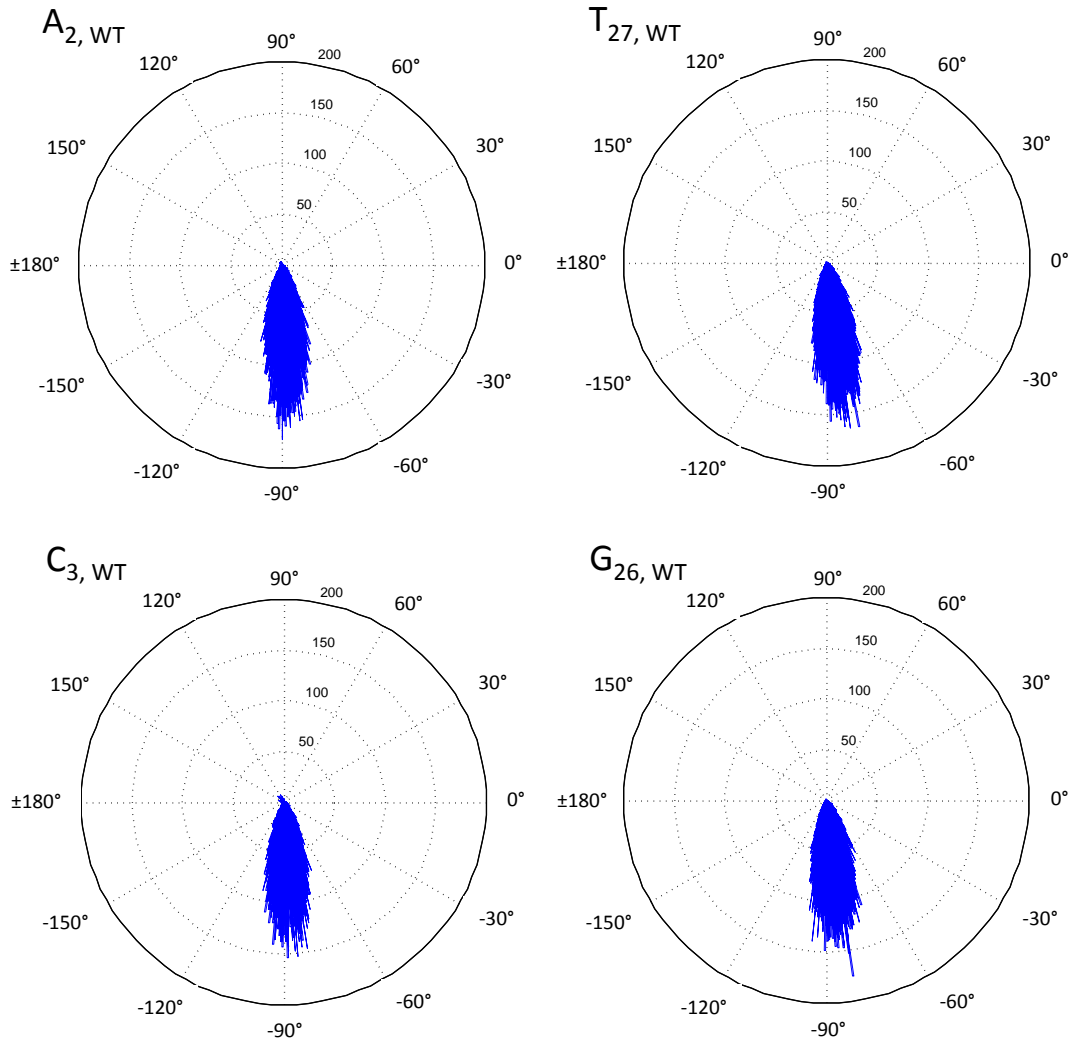



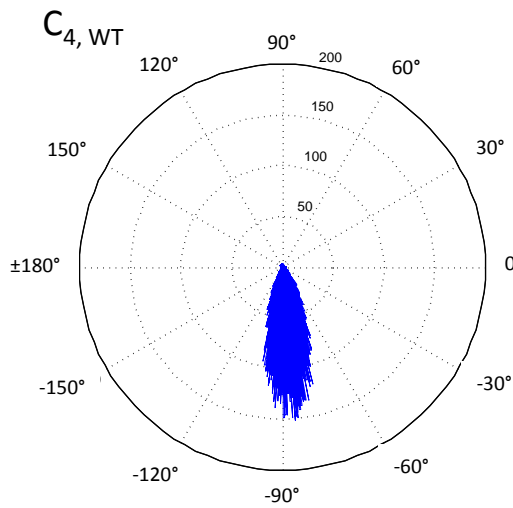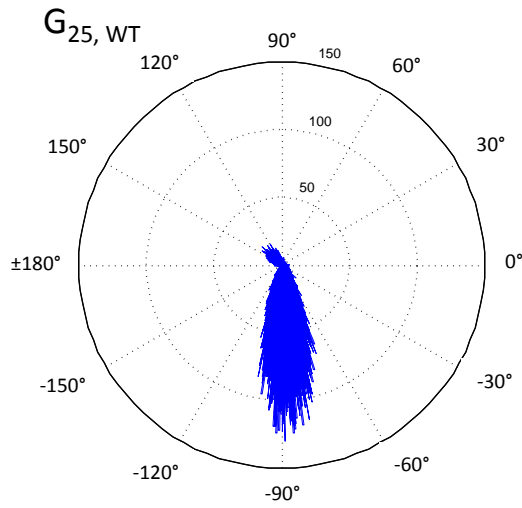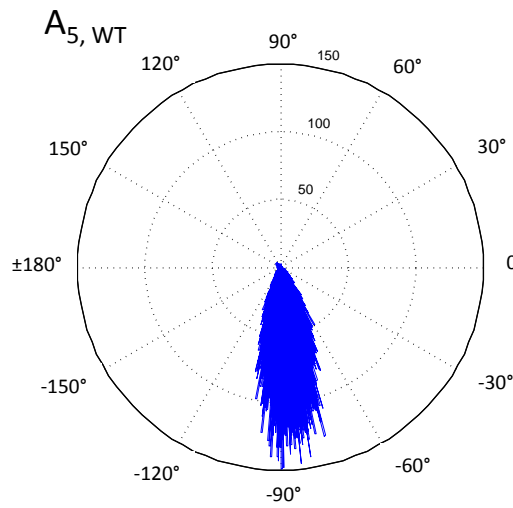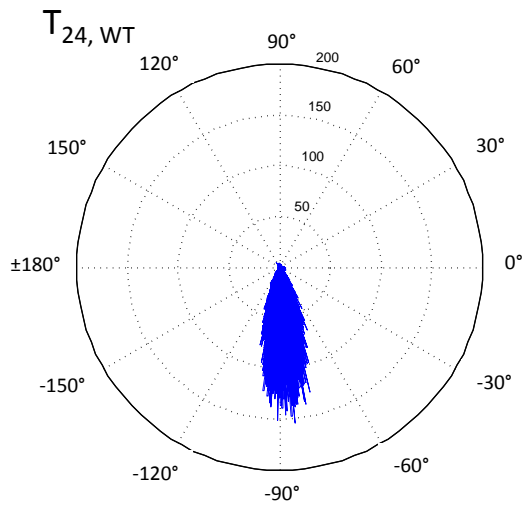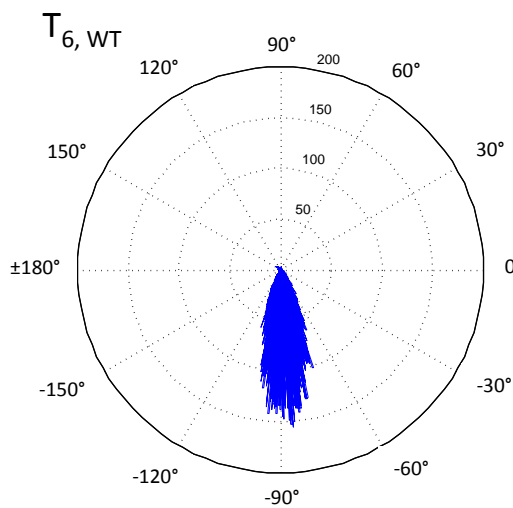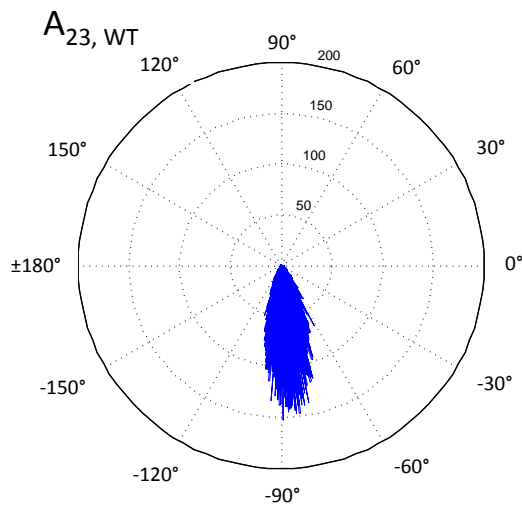

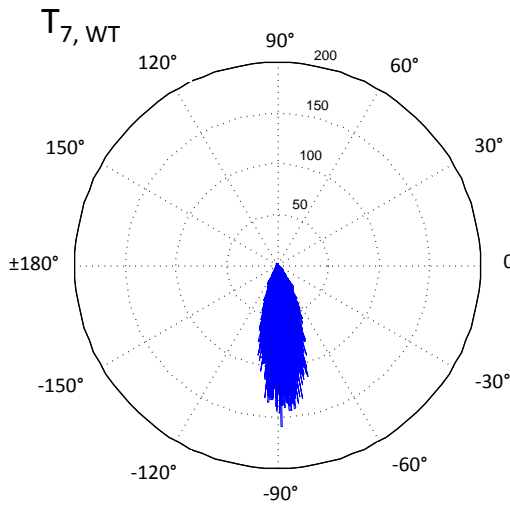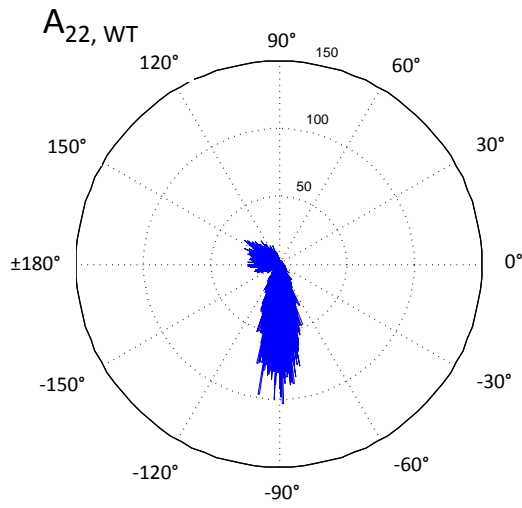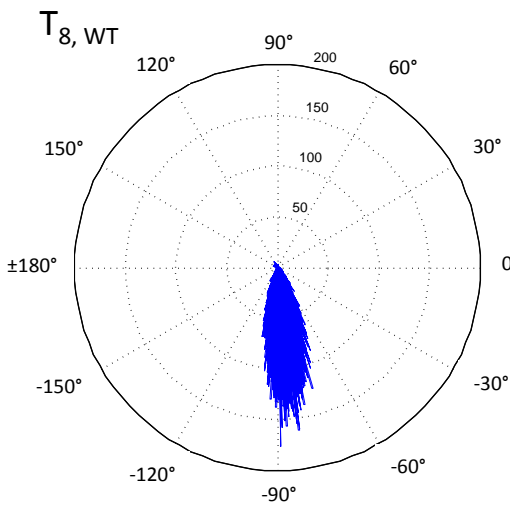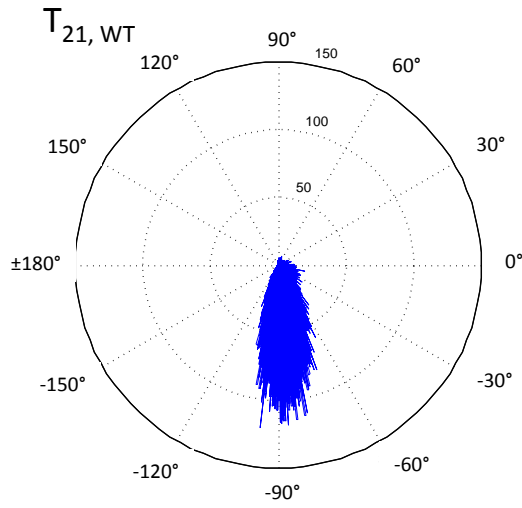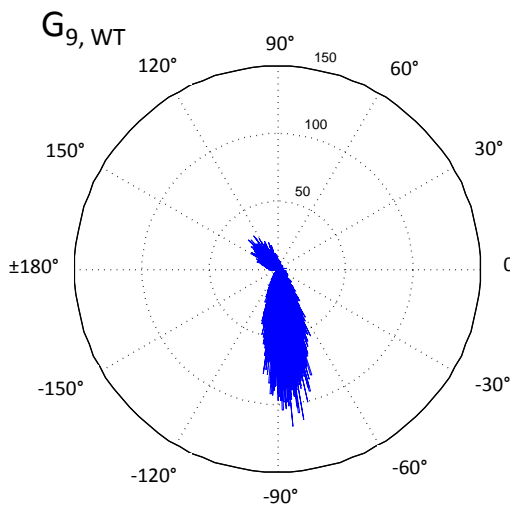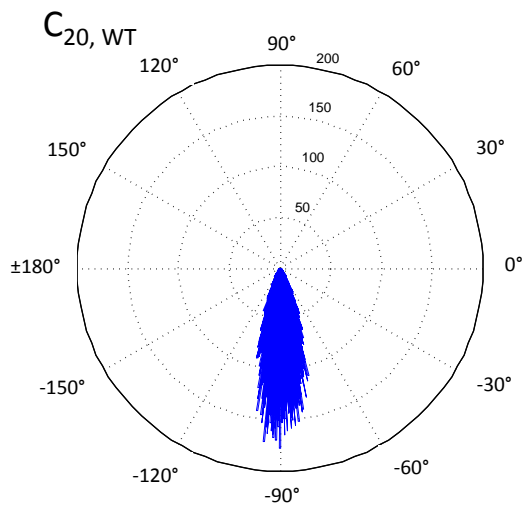

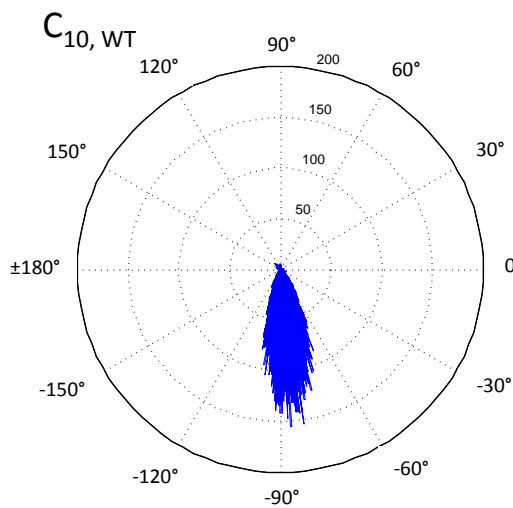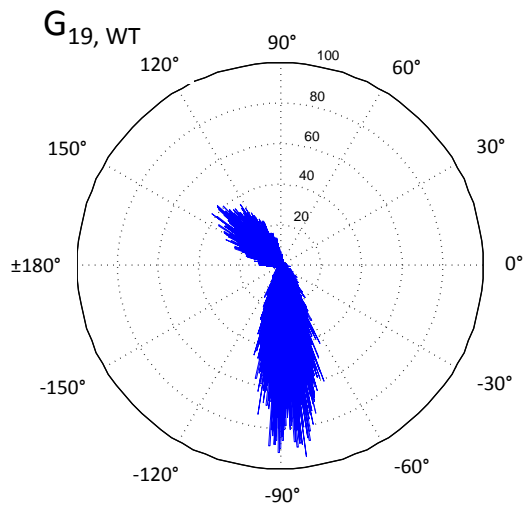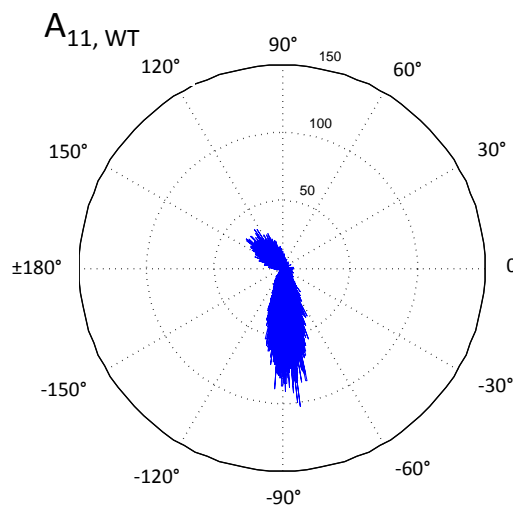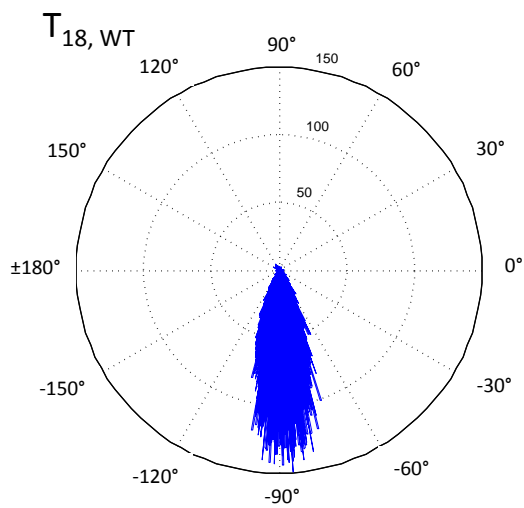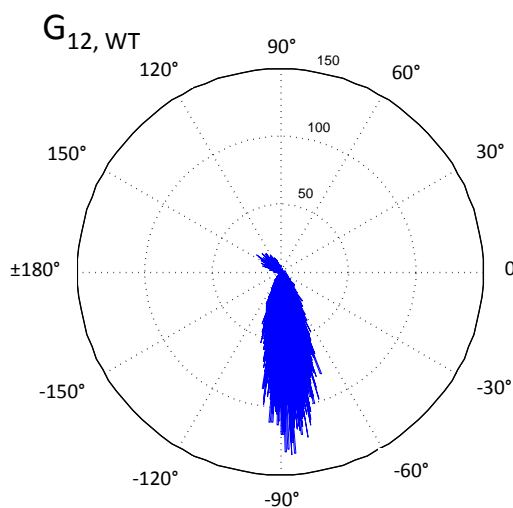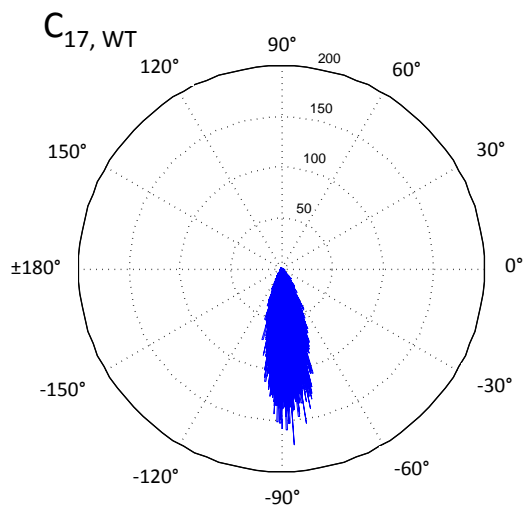

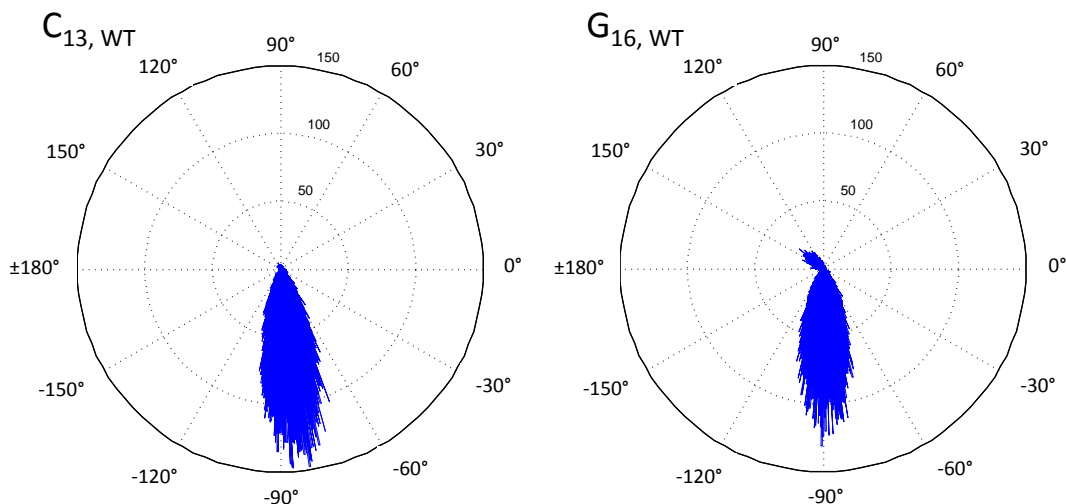

**Figure S16.**  $B_{II}/B_{II}$  torsional parameter ( $\epsilon-\zeta$ ) sampling of the equilibration and production molecular dynamics trajectory of the wild type duplex for a total period of 50,120ns. Each data point corresponds with a snapshot every 2ps. All base pairs are shown except for the 5' and 3' ends.

In the same fashion figure S17 shows the  $B_{II}/B_{II}$  torsional parameter ( $\epsilon-\zeta$ ) for the  $T_8^{Im}$  duplex. At first glance, there are no evident changes in behaviour with the exception of the  $G_{19}$  base where for the majority of the simulation time the  $B_{II}$  state is populated. In addition but to a lesser extent,  $G_9$  now also shows a bigger sampling of the  $B_{II}$  conformation. Considering that  $G_{19}$ , complemented with  $G_9$ , is the main interaction site for the Im modification in  $T_8^{Im}$ , some distortion of the conformational space is to be expected. With respect to the  $T_8$  modified base itself, it's clear that there's no sampling of  $B_{II}$  although some regions of the conformational space unknown to conventional DNA duplexes are populated as well. Considering the unique nature of the duplexes at hand, this behaviour is not entirely unexpected.

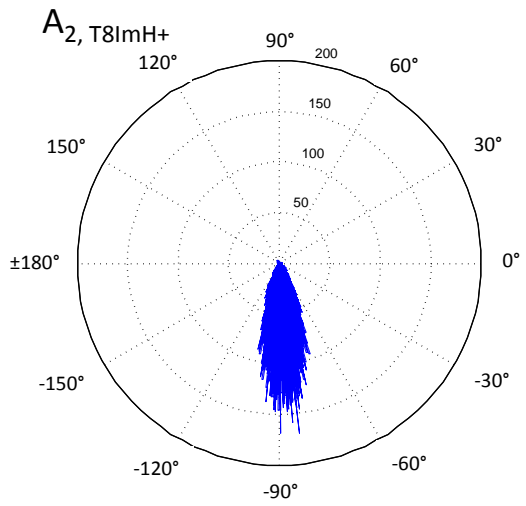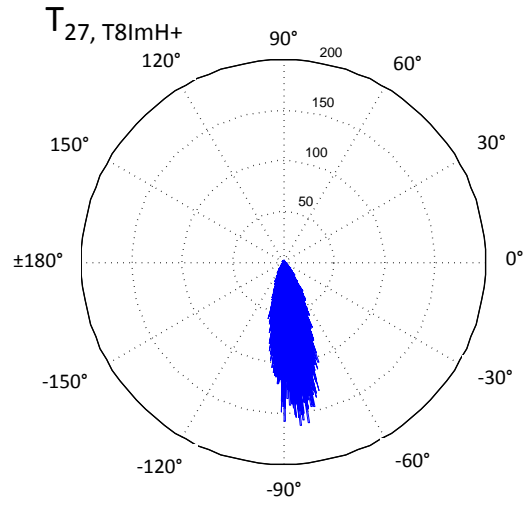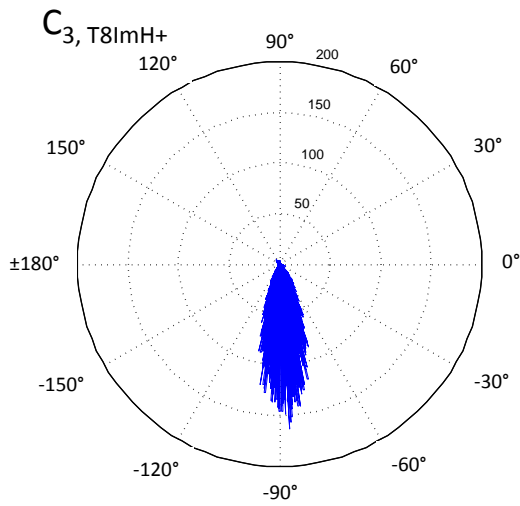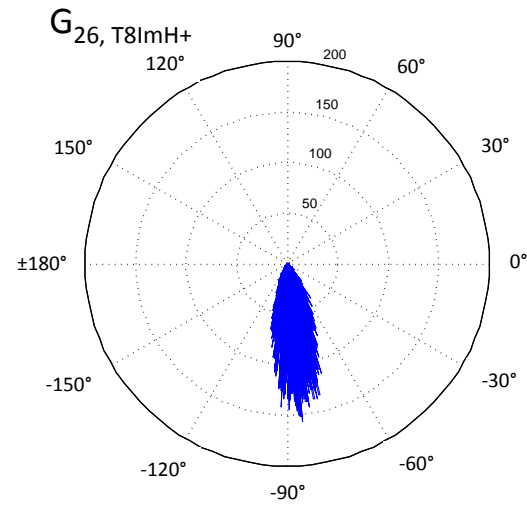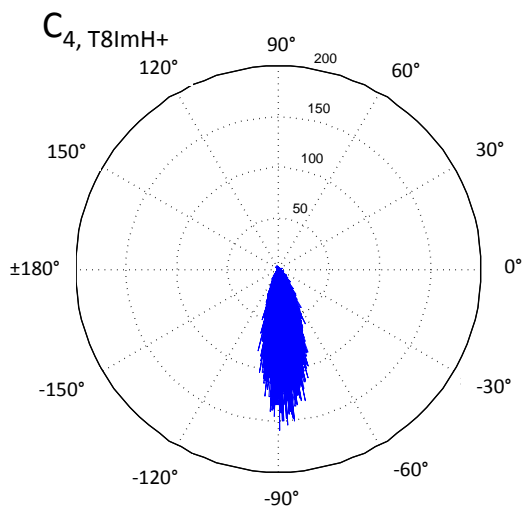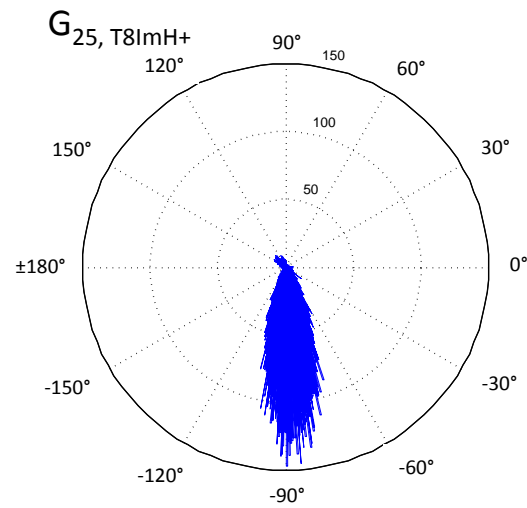

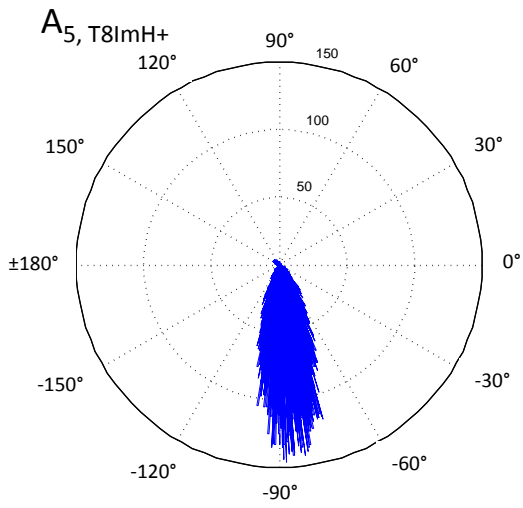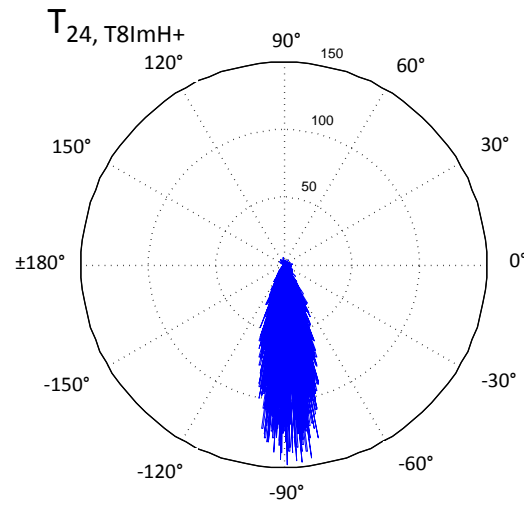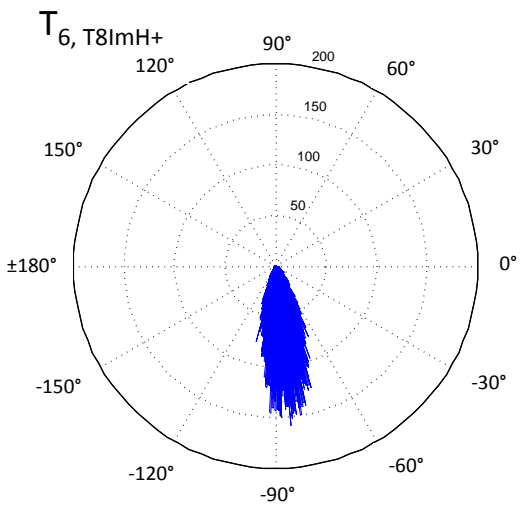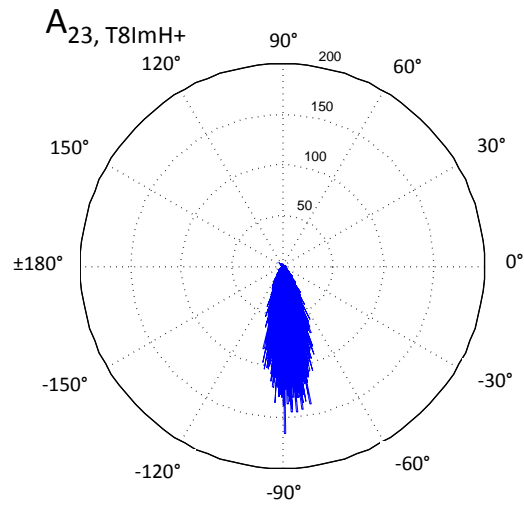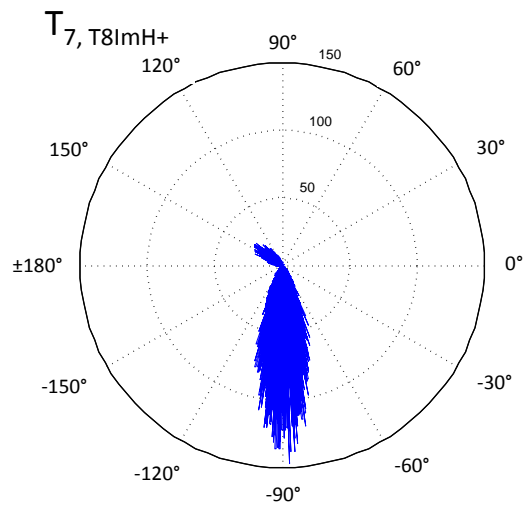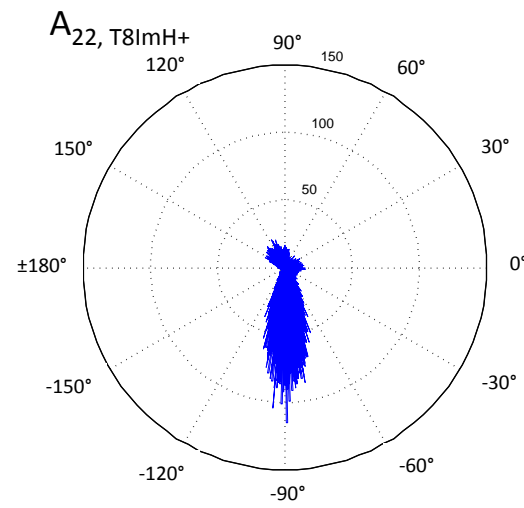

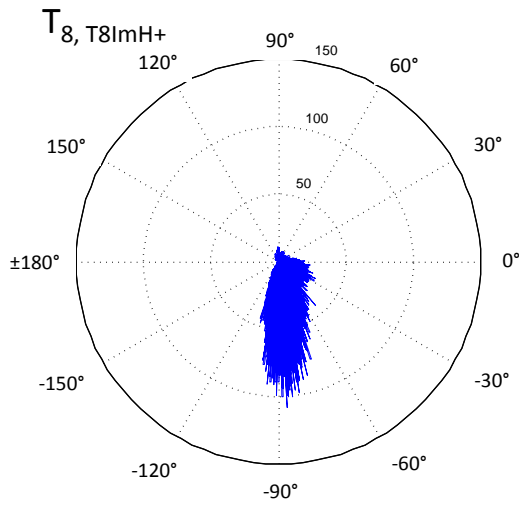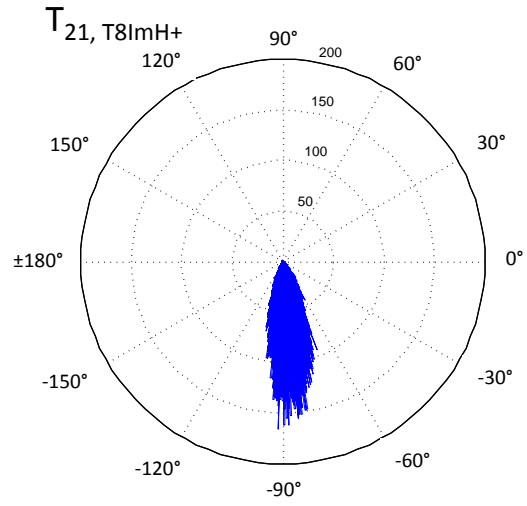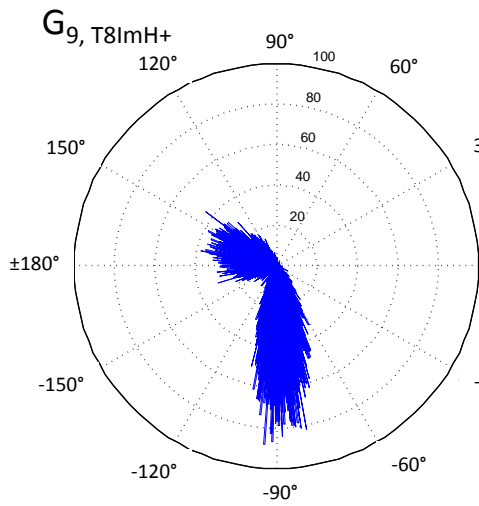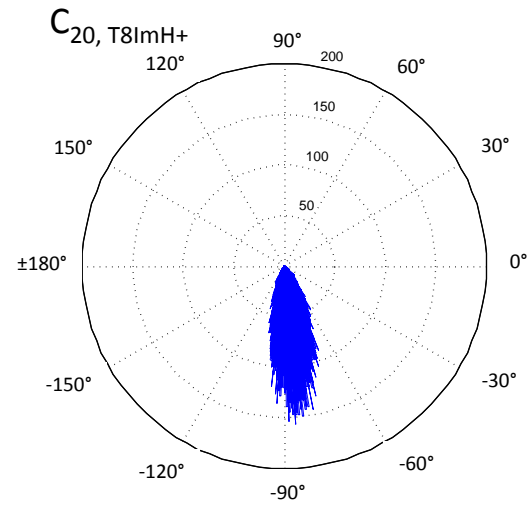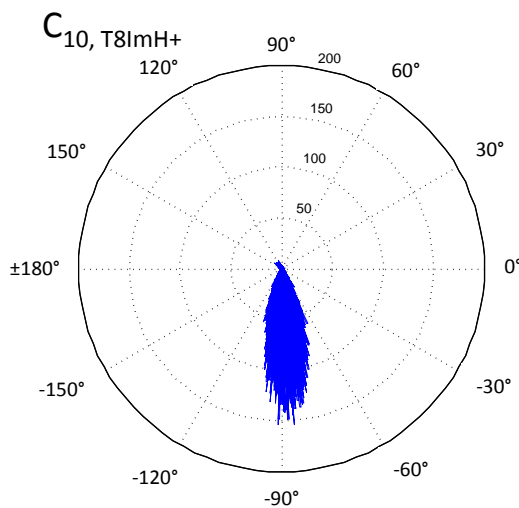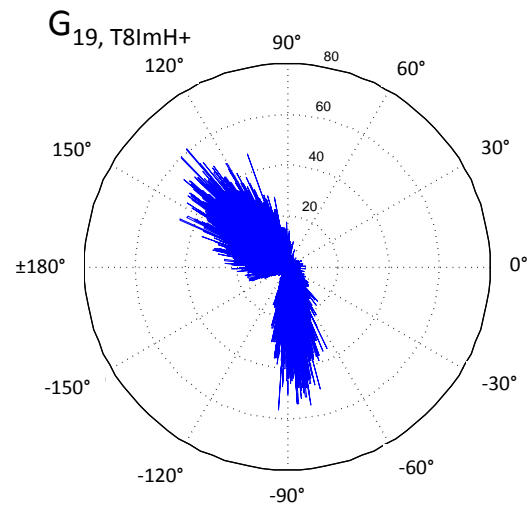

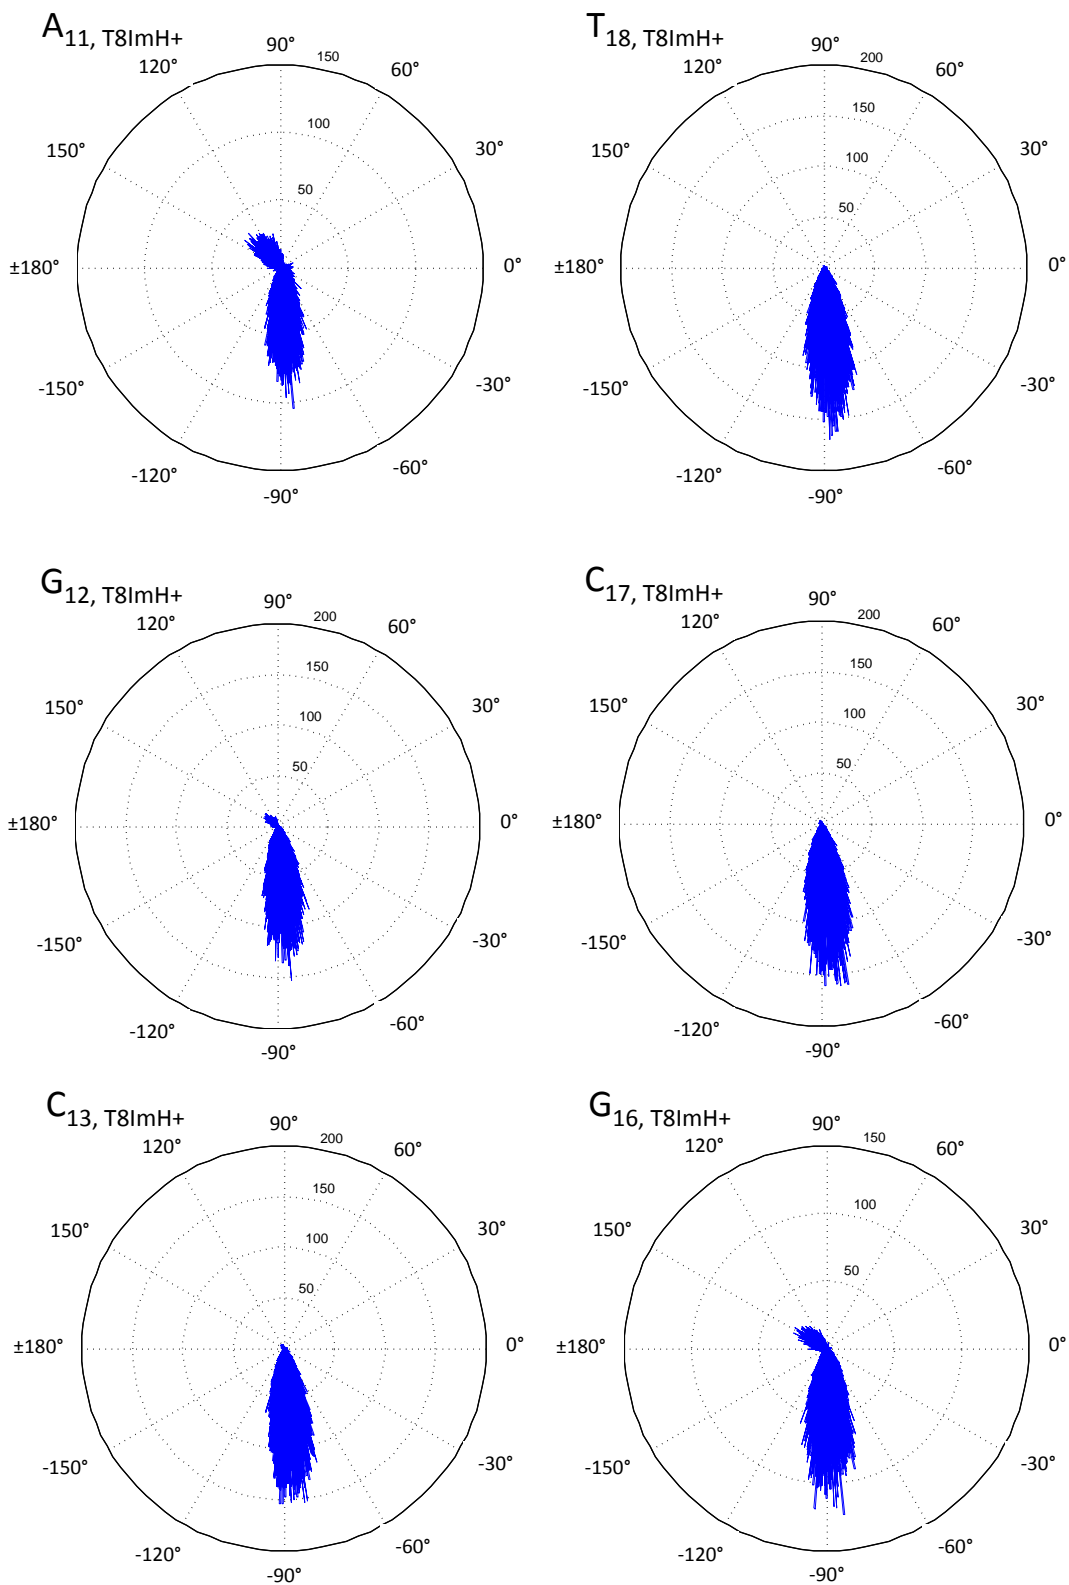

**Figure S17.** B/B<sub>II</sub> torsional parameter ( $\epsilon-\zeta$ ) sampling of the equilibration and production molecular dynamics trajectory of the  $T_8^{Im}$  duplex for a total period of 50,120ns. Each data point corresponds with a snapshot every 2ps. All base pairs are shown except for the 5' and 3' ends.



A third type of analysis concerning the structural integrity of the DNA duplex can reveal whether there's any particular bias towards a certain helical morphology (e.g. A-, B-,... duplex type). In figure S18 and S19 the classification for each dinucleotide step of the wild type and  $T_8^{lm}$  duplex are shown. In this context, it has been shown that the phosphate base  $Z_p/Z_{p(h)}$  metric is a particularly effective parameter in discriminating between the three mentioned forms of DNA. In general, no unexpected observations can be made regarding both duplexes except for step 7 of the wild type: here it may be clear that there are by and large two partially overlapping but distinct clusters present. In addition, a considerable part of all the structures are located in the TA-like region of the  $Z_p/Z_{p(h)}$  space. This is no longer the case for step 7 in  $T_8^{lm}$ ; here almost the entire range of sampled structures is spent in the B-like DNA region. In addition, again some clustering during specific time periods is visible. The situation is more or less reversed when observing the figures concerning step 8. Again, since the  $T_8^{lm}$  duplex is quite unique in its local structure at this position, some distortion of the classic B-DNA duplex is to be expected and indeed can be confirmed when comparing step 8 among wild type and  $T_8^{lm}$ . More specifically, in  $T_8^{lm}$ ,  $T_8$  exhibits a non-negligible amount of structures in the TA-like region. Nevertheless, it is reassuring that although some distortions are noticeable, no extreme outliers of helical morphology can be observed and a more than significant amount of structures are still present in the B-like DNA space.

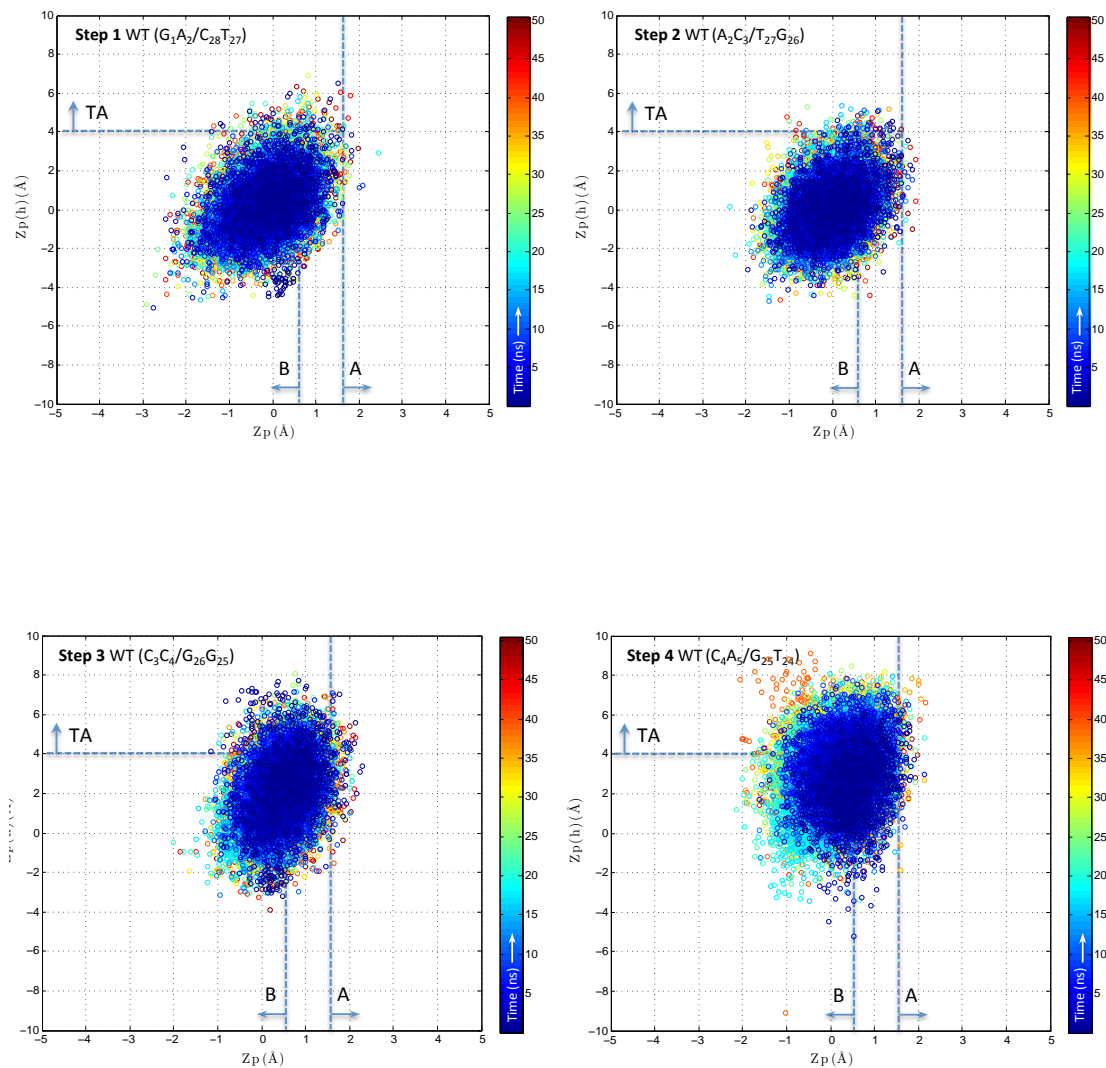

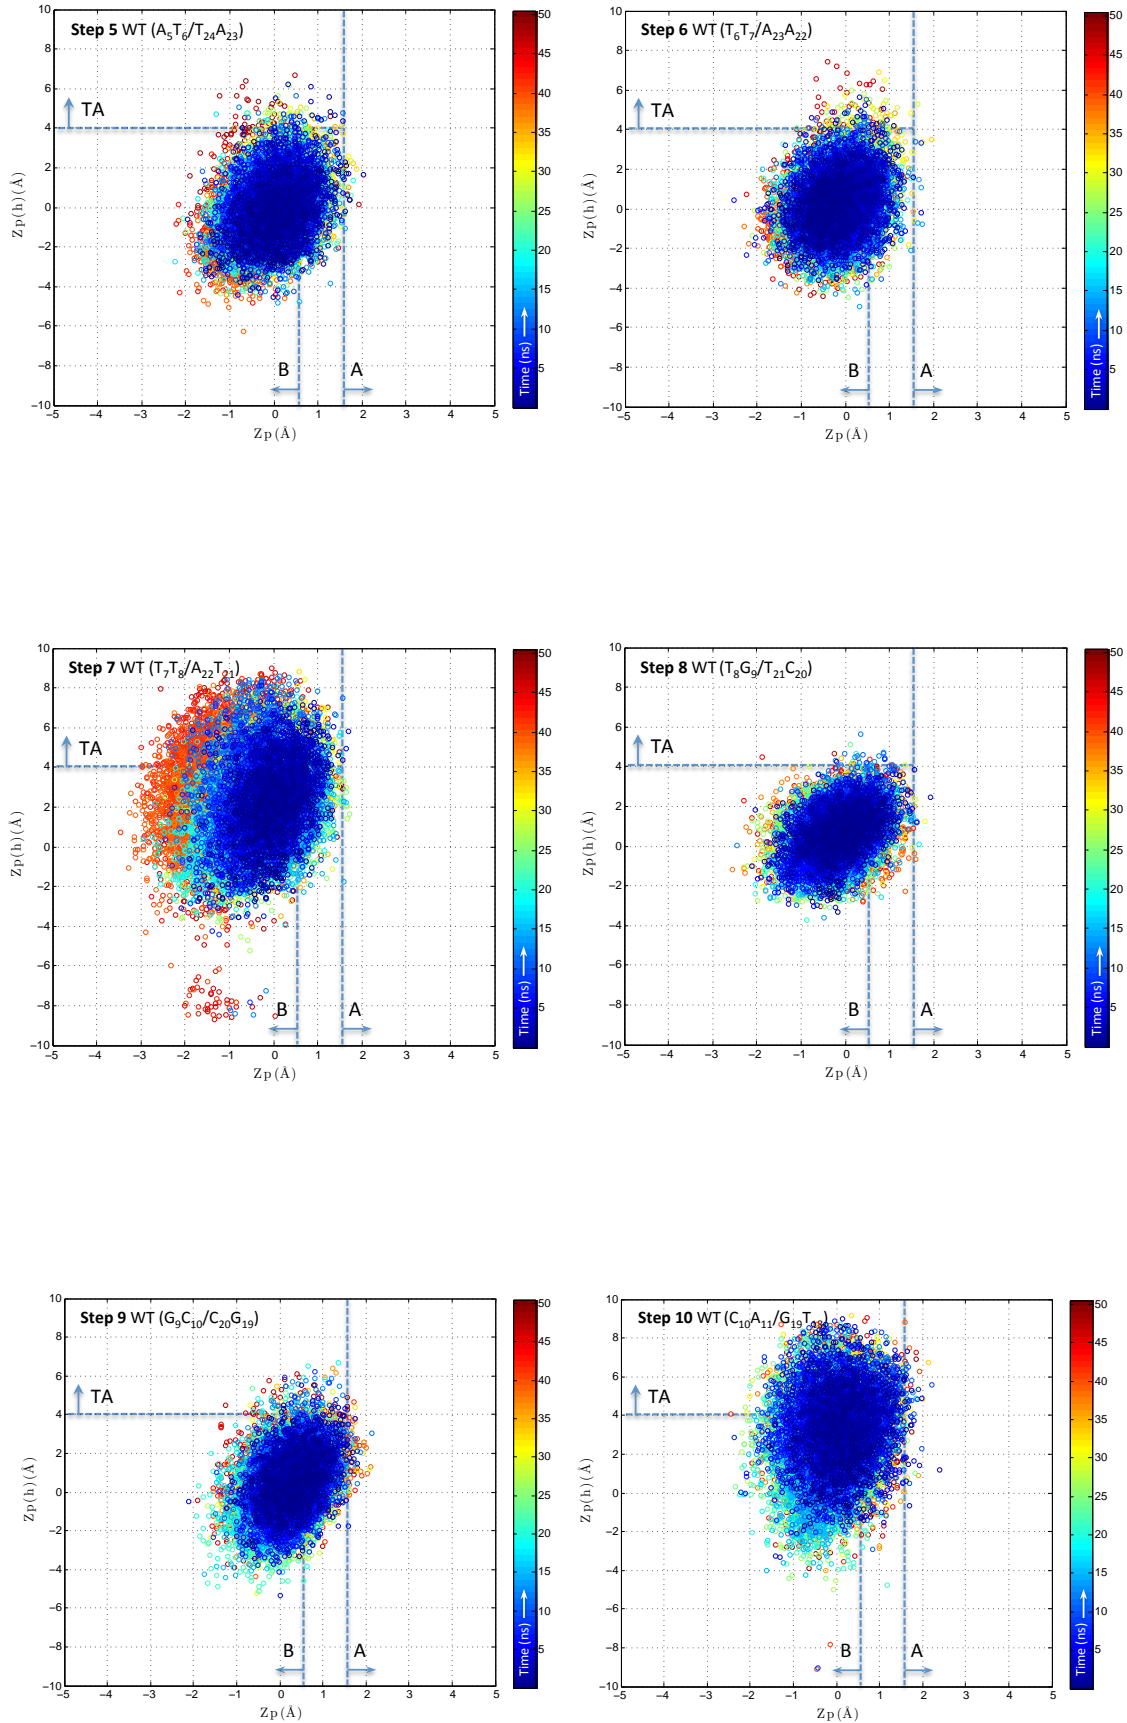

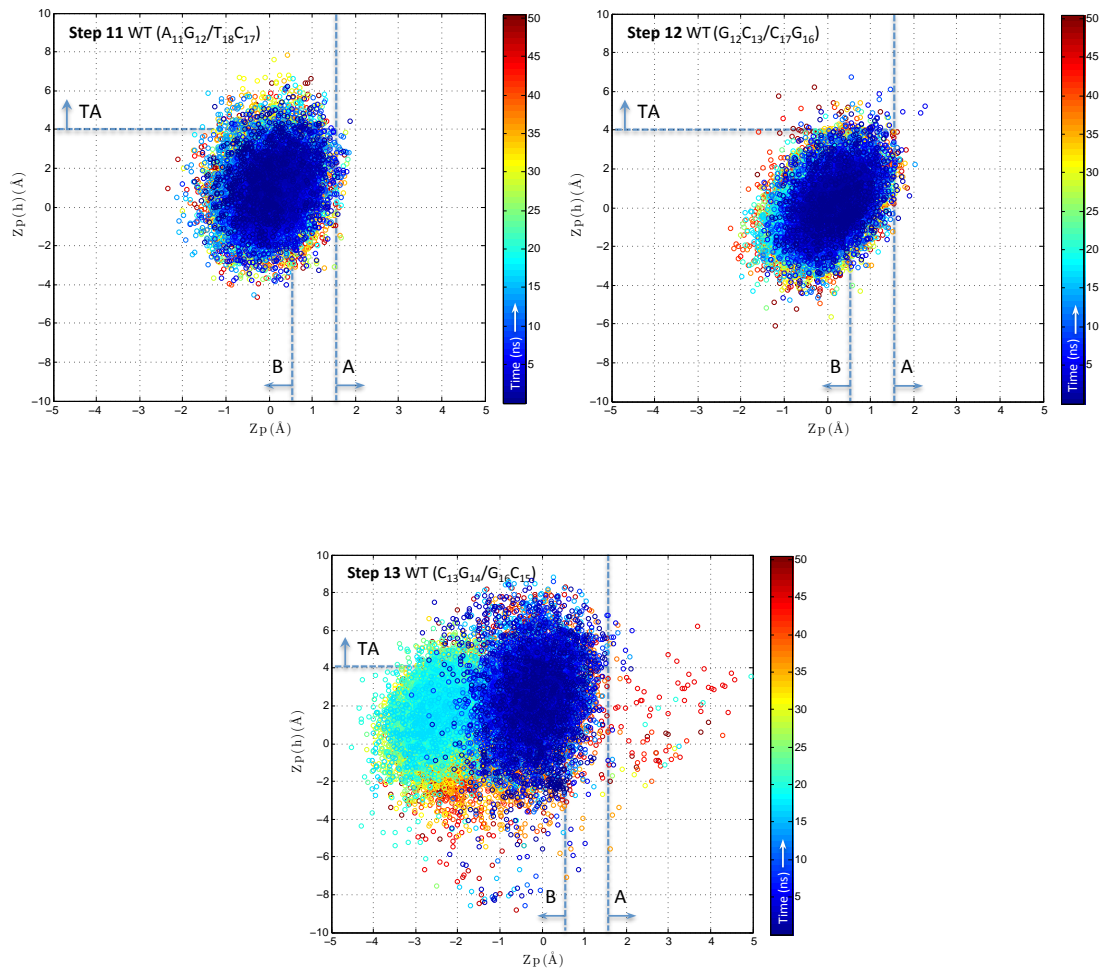

**Figure S18.**  $Z_p/Z_p(h)$  sampling of the equilibration and production molecular dynamics trajectory of the wild type duplex for a total period of 50,120ns. Each data point corresponds with a snapshot every 2ps. In each figure a dinucleotide step is classified as either A, B or TA-type DNA for every snapshot.

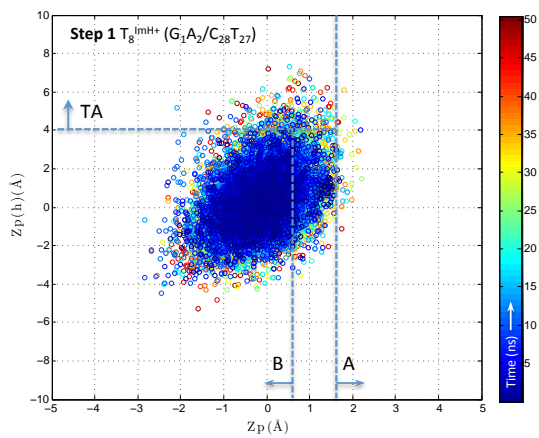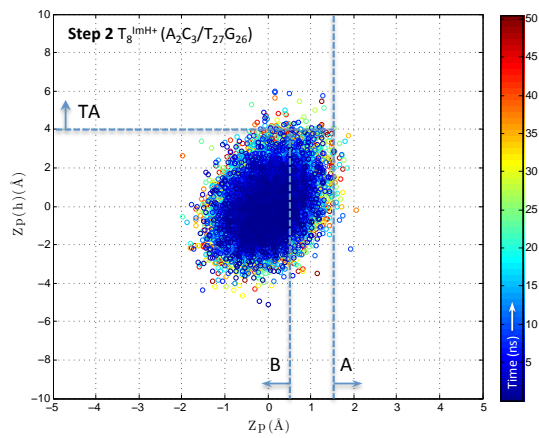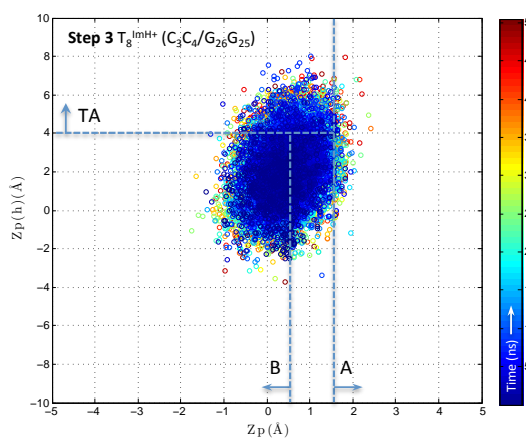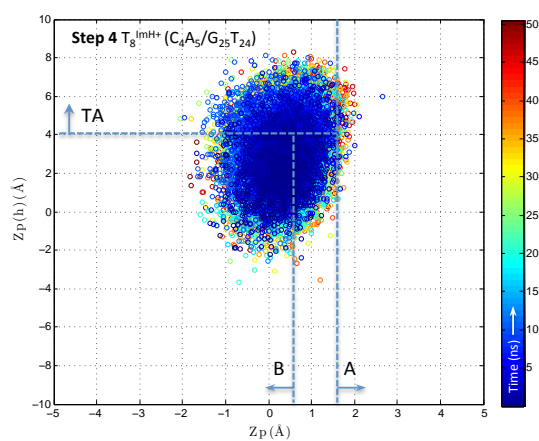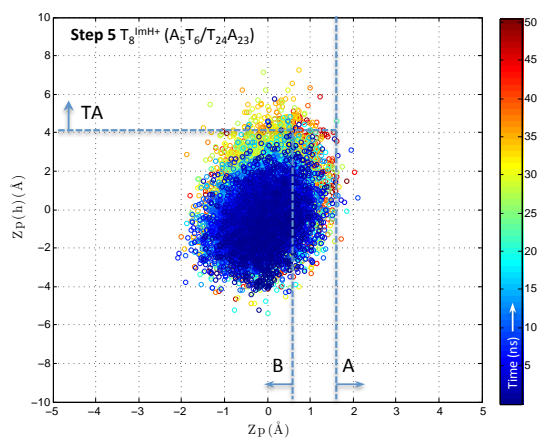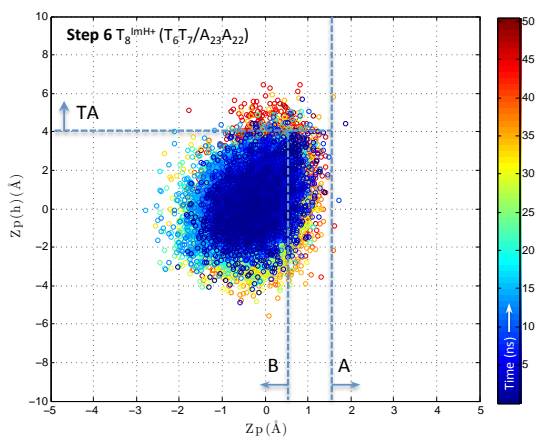

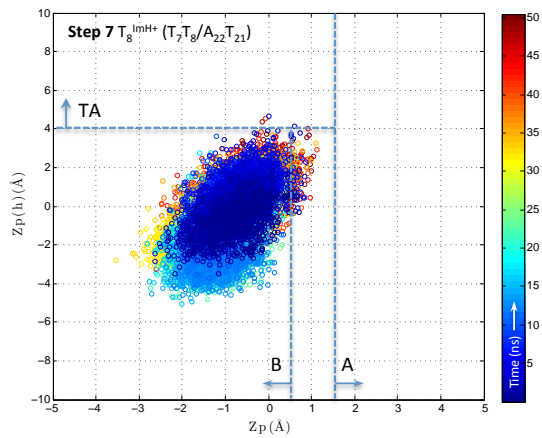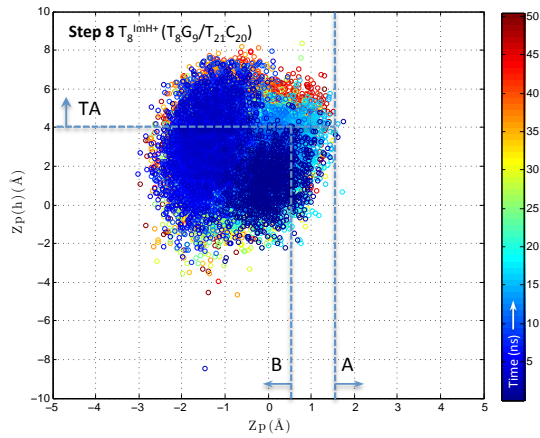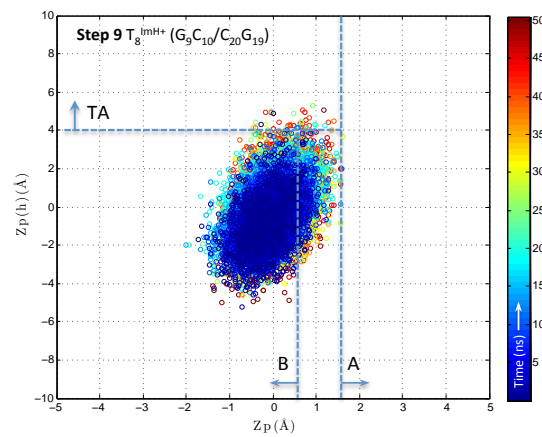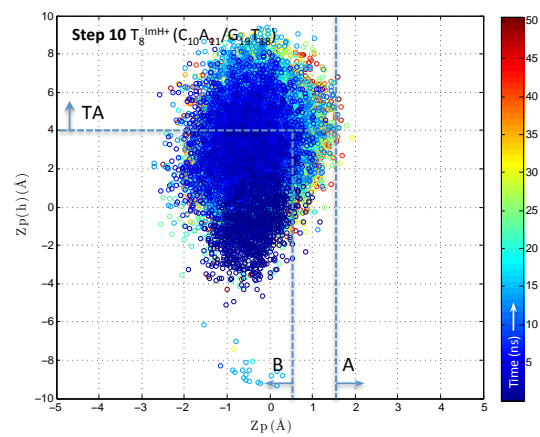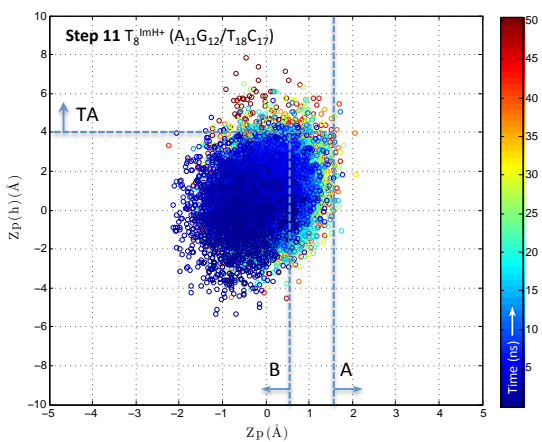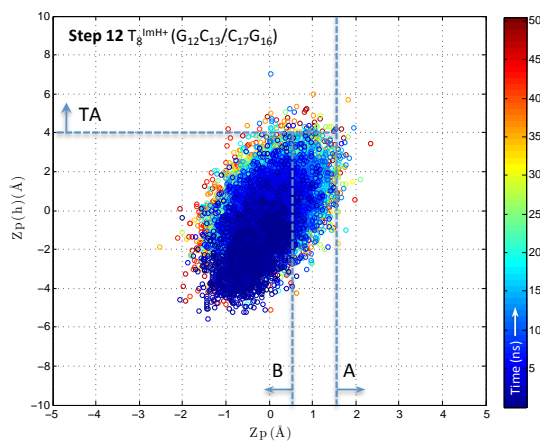

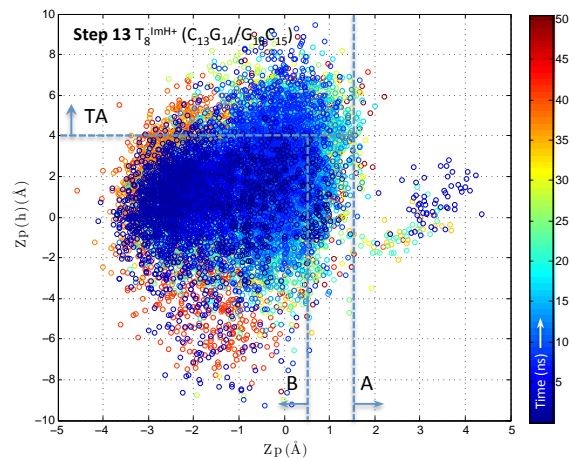

**Figure S19.**  $Z_p/Z_p(h)$  sampling of the equilibration and production molecular dynamics trajectory of the  $T_8^{im}$  duplex for a total period of 50,120ns. Each data point corresponds with a snapshot every 2ps. In each figure a dinucleotide step is classified as either A, B or TA-type DNA for every snapshot.

Hydrogen bond persistence  $T_{21}^{Im}$  duplex

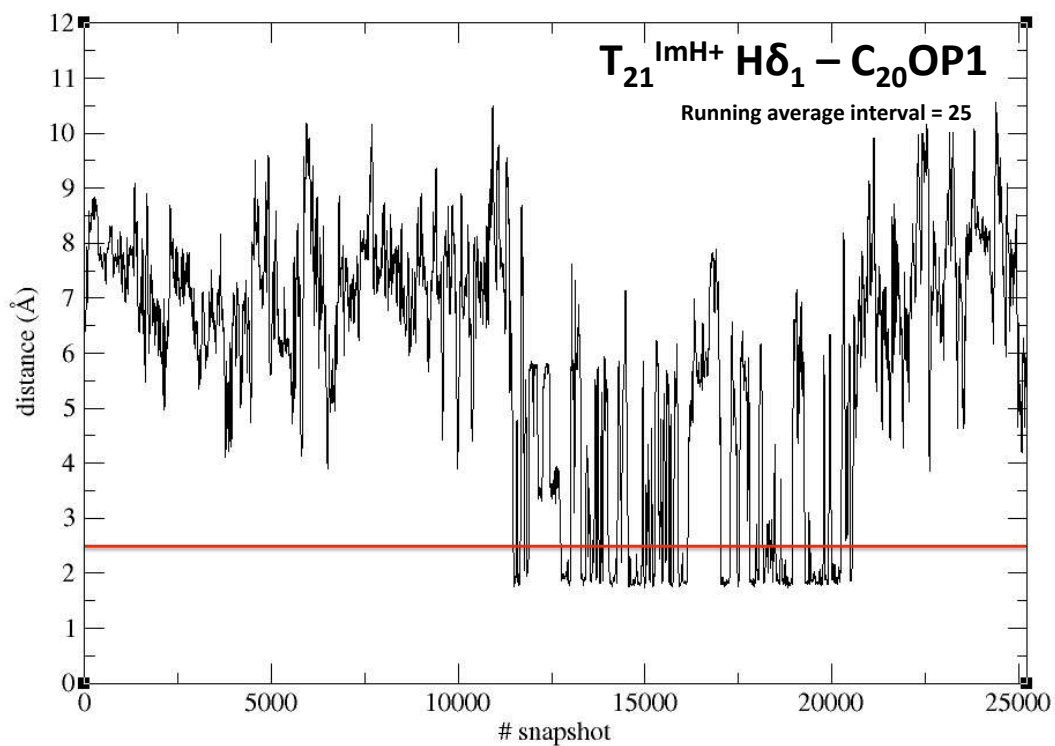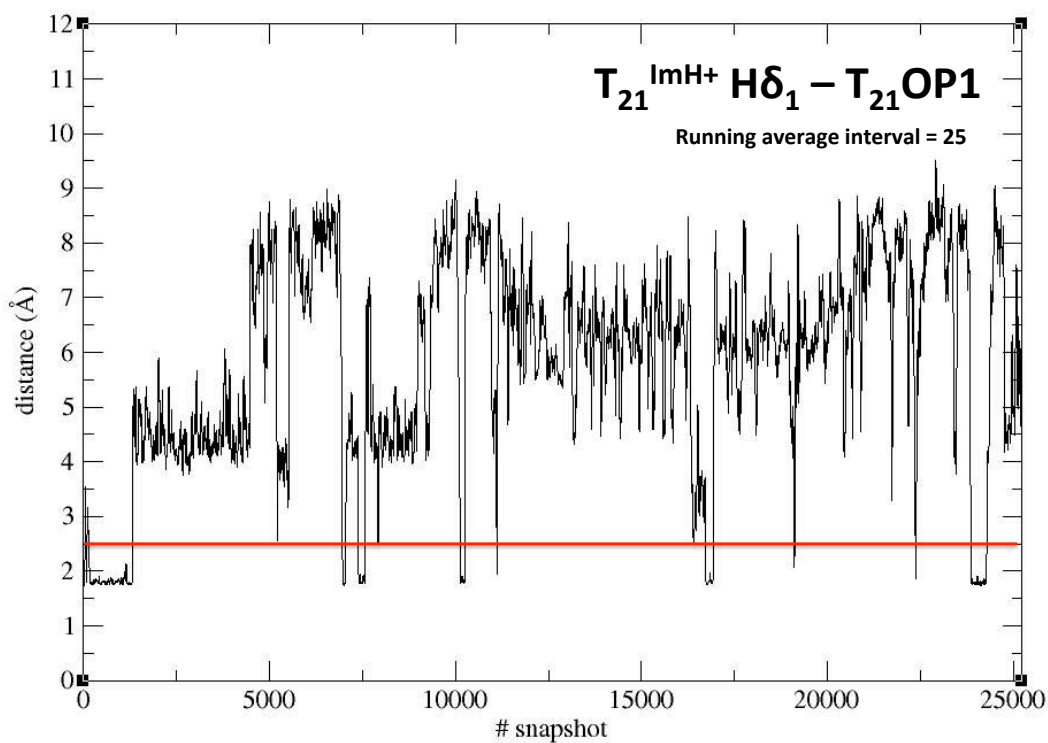

**Figure S20.** Hydrogen bond persistence of the two hydrogen bond interactions found for the  $T_{21}^{Im}$  duplex during the 50ns molecular dynamics trajectory.

Hydrogen bond persistence in the T8ImA21 versus T8Im duplex

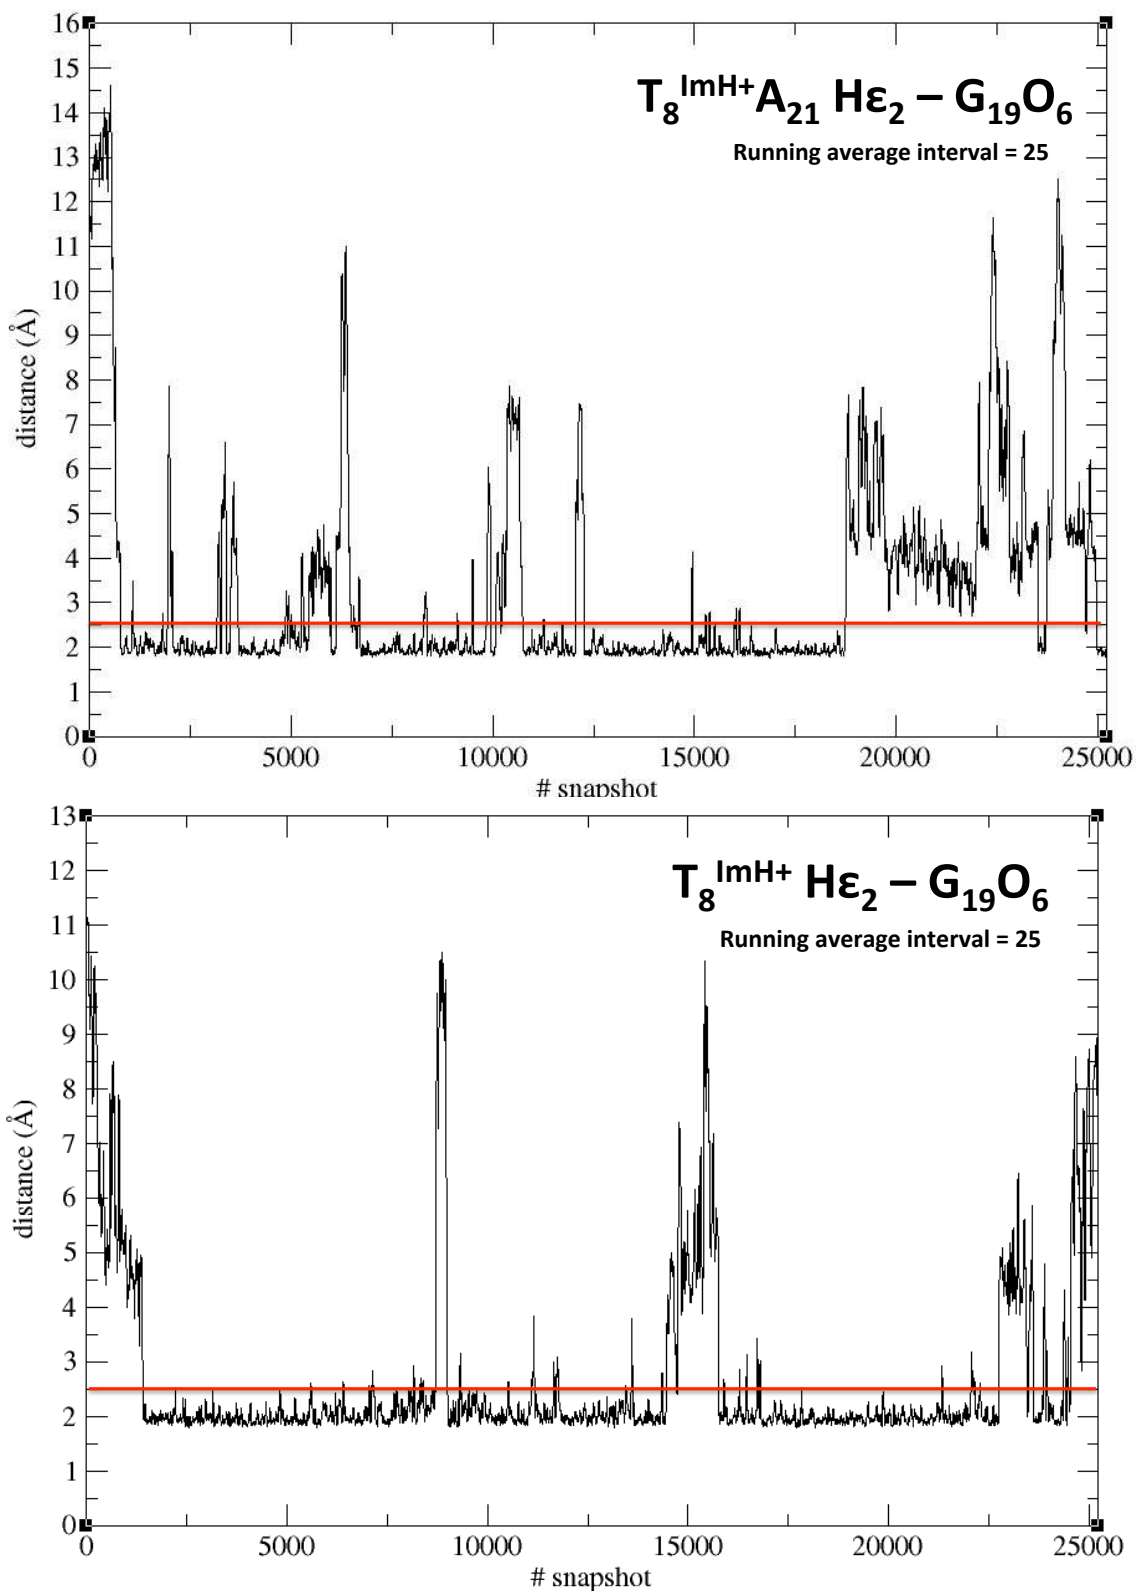

Figure S21. Comparison of the hydrogen bond persistence of the two specific hydrogen bond interactions found for the T8Im and T8<sup>Im</sup>A21 duplex during the 50ns molecular dynamics trajectories.



Overview specific H $\epsilon$ 1 nOe contacts

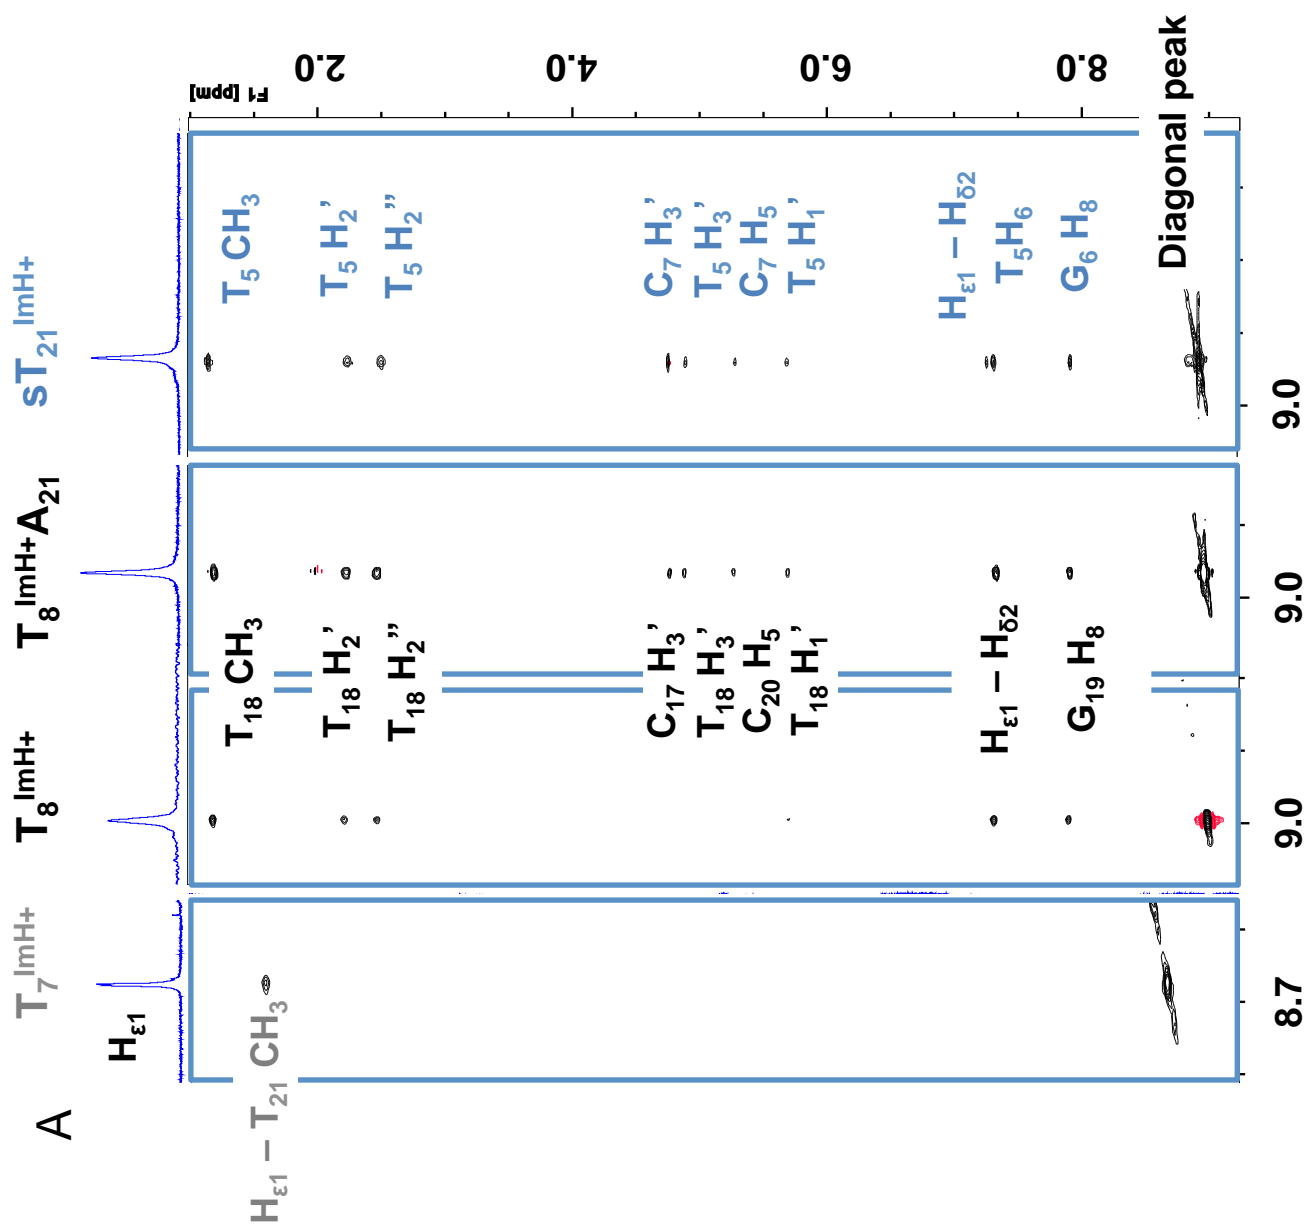

**Figure S22.** Overview of the specific nOe contacts of the H $\epsilon$ 1 proton of T $_7^{Im}$ , T $_8^{Im}$ , T $_8^{Im}A_{21}$  and sT $_{21}^{Im}$  to the DNA backbone (2D NOESY, 200ms, 700MHz, 25°C, D $_2$ O).

Overview specific H $\epsilon$ 1 – H $\delta$ 2 – N $\epsilon$ 2-H imino nOe contacts

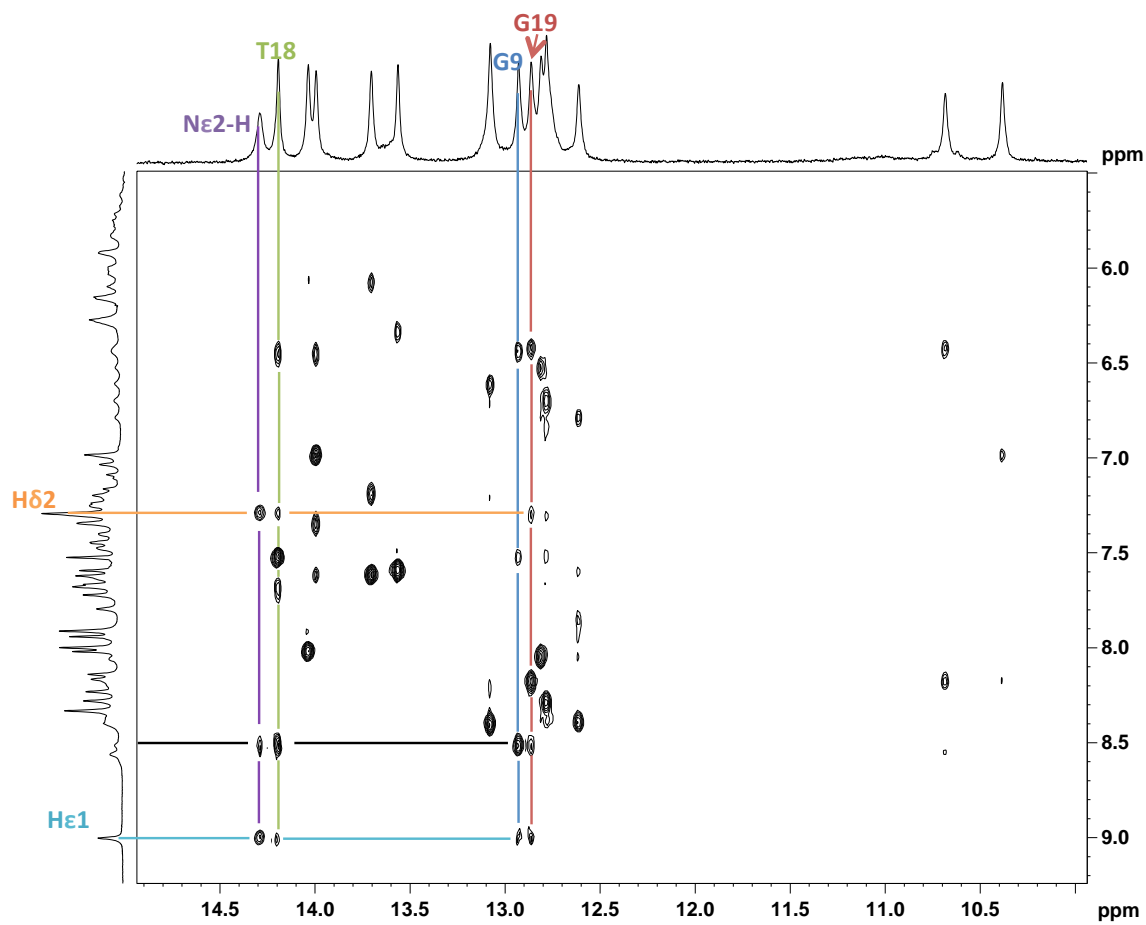

**Figure S23.** Overview of the specific nOe contacts of the H $\epsilon$ 1/H $\delta$ 2/N $\epsilon$ 2-H proton of T<sub>8</sub><sup>ImH<sup>+</sup></sup> to the DNA exchangeable imino and imidazole protons (2D NOESY, 80ms, 700MHz, 5°C, H<sub>2</sub>O/D<sub>2</sub>O, pH 5.0).

## Overview $^{31}\text{P}$ spectra $T_8^{\text{Im}}$ and wild type sequence

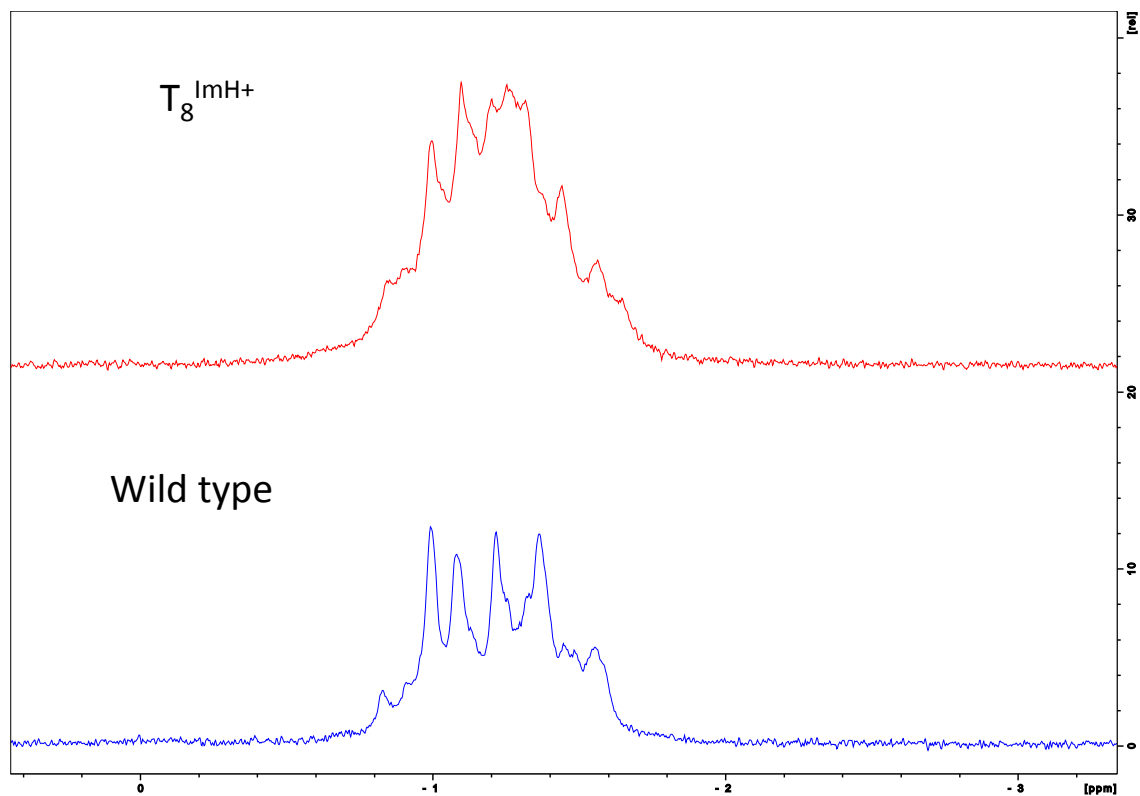

**Figure S24.** Overlay of the  $^{31}\text{P}$  spectra of both the  $T_8^{\text{Im}}$  (top) and wild type sequence (bottom, 500MHz, 298K,  $\text{D}_2\text{O}$ , pD 5.0)

In order to assess the impact of the imidazole modification and its behaviour on the phosphodiester backbone,  $^{31}\text{P}$  spectra for both the wild type and  $T_8^{\text{Im}}$  sequence were measured at pD 5.0 and 298.15K. As can be observed in the overlay (Figure S24), at first glance the differences between both spectra are limited. In case of the wild type spectrum, the signals are all residing in a region of  $\pm 1$  to 1.5 ppm indicating all phosphodiester atoms experience a rather homogeneous chemical environment, which would be the case if the perturbation of the DNA helix is very small to negligible. This is to be expected for the wild type duplex, since the only non-standard base pair present is the T-T mismatch, known to be fairly well incorporated in otherwise 'normal' B-DNA duplexes. Comparing this observation to the  $B_{\text{I}}/B_{\text{II}}$  classification for each nucleotide in the 50ns trajectory of the wild type, it may be clear that only a small fraction of nucleotides actually show limited sampling of the  $B_{\text{II}}$  sub state, with the exception of  $G_{19}$ . These nucleotides are located either in the vicinity of the T-T mismatch or near a terminal, possible fraying base pair where, in both cases, a higher mobility of the backbone is to be expected. Hence, in both cases the perturbation of the wild type phosphodiester backbone appears to be limited.

Concerning the  $^{31}\text{P}$  spectrum, the same observation appears to be valid for the  $T_8^{\text{Im}}$  duplex, since only a limited perturbation of the phosphodiester signals with respect to the wild type can be observed. Considering the  $B_{\text{I}}/B_{\text{II}}$  torsional parameter for the  $T_8^{\text{Im}}$  system, no apparent changes in behaviour can be observed with the exception of the  $T_7$ ,  $G_{19}$  and  $G_9$  nucleotide, which indeed show a higher sampling ( $>30\%$ ) of the  $B_{\text{II}}$  sub state. This can be expected since these nucleotides are also the main site of interaction for the protonated imidazole modification ( $G_9$ ,  $G_{19}$ ) or in close vicinity to the modified T-T mismatch ( $T_7$ ). Whether these two observations concerning the  $T_8^{\text{Im}}$  system contradict each other is questionable: the resonances observed in the  $^{31}\text{P}$  spectrum are the population weighted average of the chemical shifts due to various environments in many molecules, which may or may not show an interaction of the modification and hence may or may not experience a perturbation at the phosphodiester backbone. Considering the fact that the interaction is only persistent for  $\pm 30\text{-}35\%$  of the total simulation time, it may be very well possible that the majority of the

molecules are non-interacting and subsequently non-perturbed will dominate the  $^{31}\text{P}$  spectrum of this system, resulting in an almost unchanged spectrum.

**Extended melting temperatures table including thermodynamic data**

|                                  | T <sub>lm</sub>                | T-T mismatch                                   |                                |                                                |                                 |                                  |
|----------------------------------|--------------------------------|------------------------------------------------|--------------------------------|------------------------------------------------|---------------------------------|----------------------------------|
| System                           |                                | WT                                             | T <sub>6</sub> <sup>lmH+</sup> | T <sub>7</sub> <sup>lmH+</sup>                 | T <sub>21</sub> <sup>lmH+</sup> | T <sub>8</sub> <sup>lmH+</sup>   |
| T <sub>m</sub> (°C) <sup>a</sup> | n.r. <sup>c</sup>              | 48.6 ± 0.5                                     | 50.5 ± 0.2                     | 50.1 ± 0.3                                     | 53.3 ± 0.3                      | 54.6 ± 0.1                       |
| ΔT <sub>m</sub> (°C)             | n.r.                           | ref <sup>d</sup>                               | 1.9 ± 0.5                      | 1.5 ± 0.6                                      | 4.7 ± 0.6                       | 6.0 ± 0.5                        |
| pK <sub>aH</sub> <sup>b</sup>    | 7.17 ± 0.02                    | n.r.                                           | 8.13 ± 0.04                    | 7.92 ± 0.04                                    | 7.70 ± 0.02                     | 8.88 ± 0.05                      |
| ΔpK <sub>aH</sub>                | ref <sup>e</sup>               | n.r.                                           | 0.96 ± 0.04                    | 0.75 ± 0.04                                    | 0.53 ± 0.03                     | 1.71 ± 0.05                      |
| ΔG (kJ/mol) <sup>f</sup>         | n.r.                           | -69.12                                         | -71.84                         | -70.95                                         | -71.33                          | -78.03                           |
| ΔΔG (kJ/mol)                     | n.r.                           | ref <sup>d</sup>                               | -2.72                          | -1.83                                          | -2.21                           | -8.91                            |
|                                  | TA                             |                                                | AT                             |                                                | AT scrambled                    |                                  |
| System                           | T <sub>8</sub> A <sub>21</sub> | T <sub>8</sub> <sup>lmH+</sup> A <sub>21</sub> | A <sub>8</sub> T <sub>21</sub> | A <sub>8</sub> T <sub>21</sub> <sup>lmH+</sup> | sT <sub>21</sub>                | sT <sub>21</sub> <sup>lmH+</sup> |
| T <sub>m</sub> (°C)              | 58.9 ± 0.2                     | 64.1 ± 0.6                                     | 57.2 ± 0.2                     | 59.3 ± 0.5                                     | 53.2 ± 0.3                      | 59.4 ± 0.2                       |
| ΔT <sub>m</sub> (°C)             | ref                            | 5.2 ± 0.6                                      | ref                            | 2.1 ± 0.5                                      | ref                             | 6.2 ± 0.4                        |
| pK <sub>aH</sub>                 | n.r.                           | 8.72 ± 0.02                                    | n.r.                           | 7.62 ± 0.03                                    | n.r.                            | 9.07 ± 0.02                      |
| ΔpK <sub>aH</sub>                | n.r.                           | 1.55 ± 0.03                                    | n.r.                           | 0.45 ± 0.04                                    | n.r.                            | 1.9 ± 0.03                       |
| ΔG (kJ/mol)                      | -89.17                         | -98.16                                         | -87.285                        | -88.226                                        | -75.82                          | -78.47                           |
| ΔΔG (kJ/mol)                     | ref                            | -8.99                                          | ref                            | -0.94                                          | ref                             | -2.65                            |

**Table S1.** Overview of melting temperatures, pK<sub>aH</sub>, ΔG values and the differences with the respective reference systems for all duplexes studied. <sup>a</sup>T<sub>m</sub> values were determined in 100 mM NaCl, 10 mM phosphate buffer, 1 μM duplex at pH = 7.0; <sup>b</sup>pK<sub>aH</sub>-values for the imidazolium group were established using NMR monitoring of selected resonances, as explained in the text. <sup>c</sup>n.r. not relevant, since there is no melting process for the building block itself or there is no pK<sub>aH</sub> value to be determined since no imidazole functionality is present. <sup>d</sup>ref: reference system for the determination of the ΔT<sub>m</sub> or ΔΔG value of the corresponding imidazole modified duplex. <sup>e</sup>ref: reference system for the determination of the ΔpK<sub>aH</sub> values for all modified systems <sup>f</sup>values are calculated at 298K or 25°C and were determined using the Van 't Hoff extraction protocol provided by the "Thermal" software suite of the UV-VIS spectrophotometer (Varian Cary 300 Bio).
